# Supplementary material for: Reactive quenching of NO (A2Σ+) with H2O leads to HONO: a theoretical analysis of the reactive and nonreactive electronic quenching mechanisms
Source: Royal Society of Chemistry journal article supplement (doi:10.1039/d2cp04214b), 2022-01-01
Supplement: d2cp04214b1.pdf [file d2cp04214b1.pdf]

Supporting Information for “**Reactive Quenching of NO ( $A^2\Sigma^+$ ) with H<sub>2</sub>O Leads to HONO: A Theoretical Analysis of the Reactive and Nonreactive Electronic Quenching Mechanisms**”

Jose L. Guardado,<sup>1</sup> Justin A. Urquilla,<sup>1</sup> Nathanael M. Kidwell<sup>2</sup>, Andrew S. Petit,<sup>\*1</sup>

<sup>1</sup> *Department of Chemistry and Biochemistry, California State University – Fullerton, Fullerton, CA 92834-6866, USA*

<sup>2</sup> *Department of Chemistry, The College of William and Mary, Williamsburg, VA 23187-8795, USA*

\* Author to whom correspondence should be addressed. E-mail: [apetit@fullerton.edu](mailto:apetit@fullerton.edu)

## Table of Contents

|                                                                                                                                                                                                                                                                            | <b>Page(s)</b> |
|----------------------------------------------------------------------------------------------------------------------------------------------------------------------------------------------------------------------------------------------------------------------------|----------------|
| <b>Figure S1:</b> D <sub>1</sub> and D <sub>2</sub> electronic energies as a function of $r_{\text{OH}_A}$ at the fixed intermolecular distance $R_{\text{ON}}=1.787 \text{ \AA}$ as calculated using the multireference method (9,9) NEVPT2/aug-cc-pVTZ.                  | <b>S3</b>      |
| <b>Figure S2-S3:</b> SOMOs for the D <sub>1</sub> and D <sub>2</sub> states at $R_{\text{ON}}=1.787 \text{ \AA}$ and $r_{\text{OH}_A} = 1.0 \text{ \AA}$ or $r_{\text{OH}_A} = 1.30 \text{ \AA}$ as calculated using EOM-EA-CCSD/aug-cc-pVTZ and (9,9) NEVPT2/aug-cc-pVTZ. | <b>S4-S5</b>   |
| <b>Figures S4-S9:</b> D <sub>1</sub> and D <sub>2</sub> electronic energies as a function of the torsion angle $\phi_{\text{ONOH}}$ at various fixed intermolecular distances, $R_{\text{ON}}$ .                                                                           | <b>S6-S11</b>  |
| <b>Figures S10-S11:</b> D <sub>1</sub> and D <sub>2</sub> electronic energies as a function of the N-O bond length at various fixed intermolecular distances, $R_{\text{ON}}$ .                                                                                            | <b>S12-S13</b> |
| <b>Figure S12-S14:</b> D <sub>1</sub> and D <sub>2</sub> electronic energies as a function of $r_{\text{OH}_A}$ at various fixed intermolecular distances, $R_{\text{ON}}$ .                                                                                               | <b>S14-S16</b> |
| <b>Figure S15-S19:</b> D <sub>1</sub> and D <sub>2</sub> electronic energies as a function of $r_{\text{OH}_B}$ at various fixed intermolecular distances, $R_{\text{ON}}$ .                                                                                               | <b>S18-S21</b> |
| <b>Tables S1-S2:</b> Relative electronic energies used to generate Figure 4 and Figure S19.                                                                                                                                                                                | <b>S22-S23</b> |
| <b>Tables S3-S8:</b> Relative electronic energies used to generate Figure 7 and Figures S4-S9.                                                                                                                                                                             | <b>S24-S27</b> |
| <b>Tables S9-S12:</b> Relative electronic energies used to generate Figure 8 and Figures S10-S11.                                                                                                                                                                          | <b>S28-S33</b> |
| <b>Tables S13-S20:</b> Relative electronic energies used to generate Figures 9-10 and Figures S12-S18.                                                                                                                                                                     | <b>S34-S41</b> |
| <b>Table S21:</b> Relative electronic energies used to generate Figure S1.                                                                                                                                                                                                 | <b>S42</b>     |

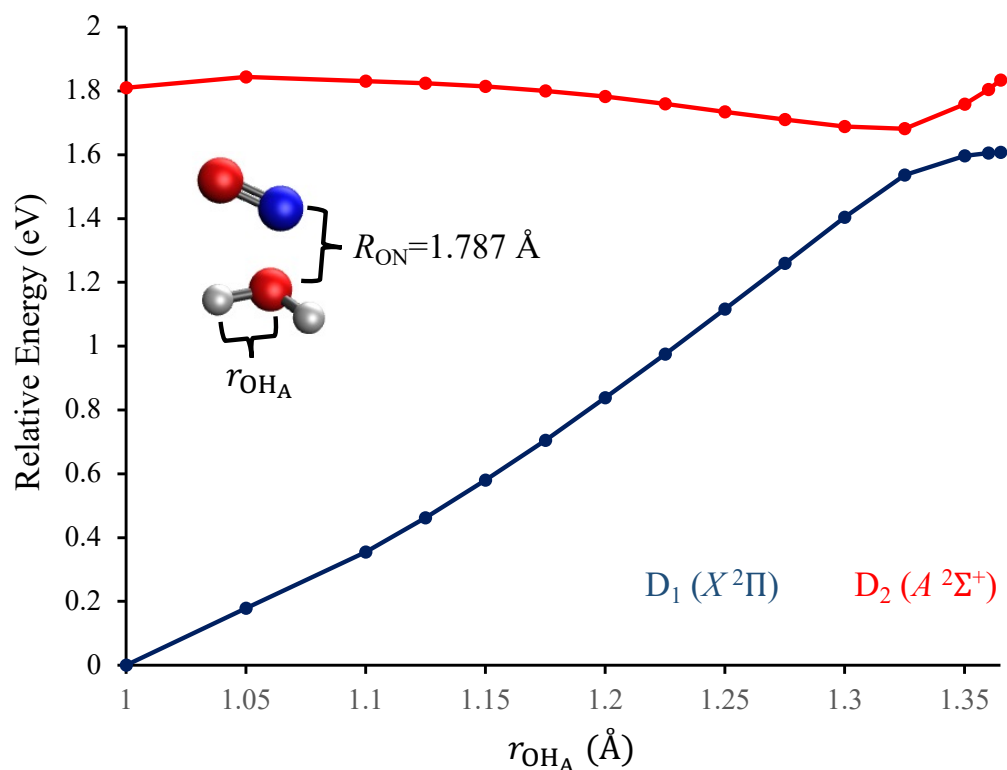

**Figure S1.** Cuts of the adiabatic PESs for  $\text{NO}+\text{H}_2\text{O}$  as a function of the O-H bond length that is nearly perpendicular to the NO,  $r_{\text{OHA}}$  at a fixed  $R_{\text{ON}} = 1.787 \text{ \AA}$ . The geometries are the same as in Figure 10. The energies were calculated using (9,9) NEVPT2/aug-cc-pVTZ. These calculations were built off a CASSCF reference wave function with a 9 electrons in 9 orbitals active space and a state-averaging over 3 states. Dynamic electron correlation was included using N-electron valence state perturbation theory. The energies are reported relative to that of  $D_1$  at  $r_{\text{OHA}}=1.0 \text{ \AA}$ . The calculations were performed using ORCA 5.0.3.<sup>1,2</sup>

The cuts of the PESs shown above are similar to those presented in Figure 10. Specifically, the energy of the  $D_1$  state increases rapidly as  $r_{\text{OHA}}$  increases. In contrast, the energy of  $D_2$  exhibits a much weaker dependence on  $r_{\text{OHA}}$ , slightly increasing and then decreasing as the bond is stretched. The  $D_1$  and  $D_2$  electronic states grow closer together as  $r_{\text{OHA}}$  increases. Finally, at  $r_{\text{OHA}} = 1.0 \text{ \AA}$ ,  $E_{D_2} - E_{D_1}$  is 1.81 eV at the (9,9) NEVPT2/aug-cc-pVTZ level of theory versus 1.90 eV at the EOM-EA-CCSD/aug-cc-pVTZ level of theory.

Figures 10 and S1 are not in perfect agreement. The  $D_2$  PES reaches a maximum at a significantly smaller value of  $r_{\text{OHA}}$  for (9,9) NEVPT2/aug-cc-pVTZ than for EOM-EA-CCSD/aug-cc-pVTZ. Moreover, Figure S1 does not exhibit a conical intersection but rather an avoided crossing, which we confirmed by analyzing the electronic character of the adiabats above and below  $r_{\text{OHA}} = 1.35 \text{ \AA}$ . Because  $E_{D_2} - E_{D_1}$  is strongly affected by both  $R_{\text{ON}}$  and  $r_{\text{OHA}}$ , the data in Figure S1 suggests that a  $D_2$ - $D_1$  conical intersection exists at the (9,9) NEVPT2/aug-cc-pVTZ level of theory but at a slightly different value of  $R_{\text{ON}}$ .

Overall, the application of multireference electronic structure methods does not fundamentally

change the mechanistic picture from that presented in Figure 10. Increasing  $r_{\text{OH}_A}$  is feasible on  $D_2$  because it does not significantly increase  $E_{D_2}$ . Moreover, stretching this O-H bond significantly reduces the  $D_2$ - $D_1$  energy gap. Figure S1 displays an avoided crossing between  $D_2$  and  $D_1$ , with a  $D_2$ - $D_1$  conical intersection likely occurring at a slightly different value of  $R_{\text{ON}}$ .

Finally, it is worth noting that Figure S1 is not necessarily more accurate than Figure 10. While a multireference approach was used in Figure S1, dynamic electron correlation was only approximately captured via second-order perturbation theory. EOM-EA-CCSD includes higher-order dynamic electron correlation for states which have dominant single-excitation character from the reference. As discussed in the main text, we verified that this is true for all of the states considered in this study.

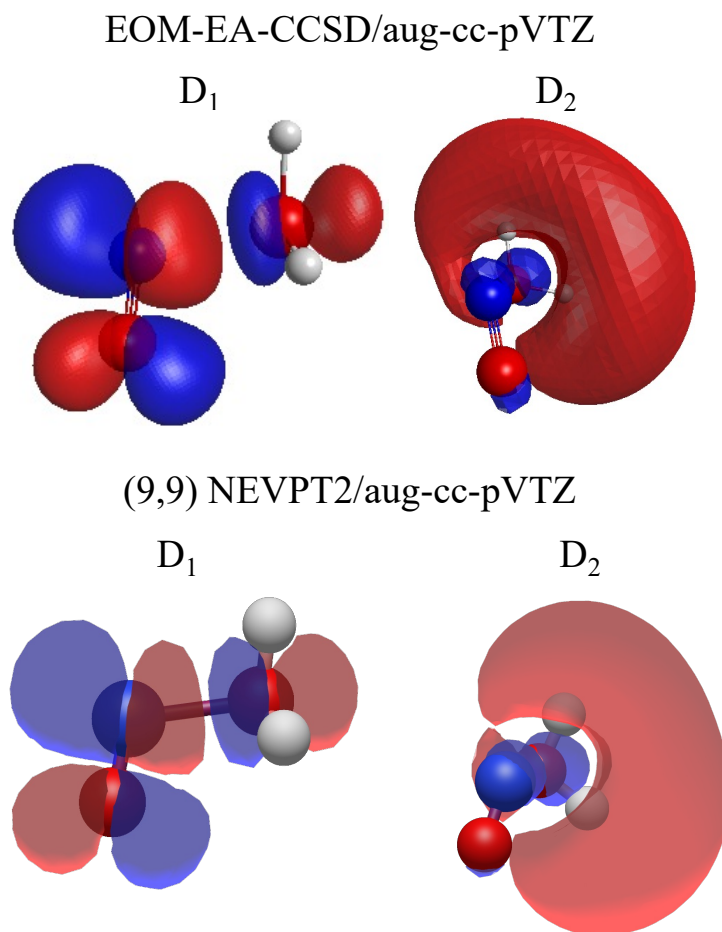

**Figure S2.** Singly occupied molecular orbitals (SOMOs) of  $D_1$  and  $D_2$  as calculated using the EOM-EA-CCSD/aug-cc-pVTZ and (9,9) NEVPT2/aug-cc-pVTZ levels of theory at an EOM-EA-CCSD/aug-cc-pVTZ optimized geometry with  $R_{\text{ON}}=1.787$  Å and  $r_{\text{OH}_A} = 1.0$  Å. For the EOM-EA-CCSD data, the SOMOs were obtained using natural transition orbital analysis and plotted using wxMacMolPlt.<sup>3,4</sup> For the (9,9) NEVPT2/aug-cc-pVTZ data, the SOMOs were plotted using Avogadro.<sup>5</sup> Note that the electronic characters of  $D_1$  and  $D_2$  are identical for both methods. In particular, the SOMO for the  $D_2$  state is consistent with electron transfer from the NO and to the  $\text{H}_2\text{O}$ .

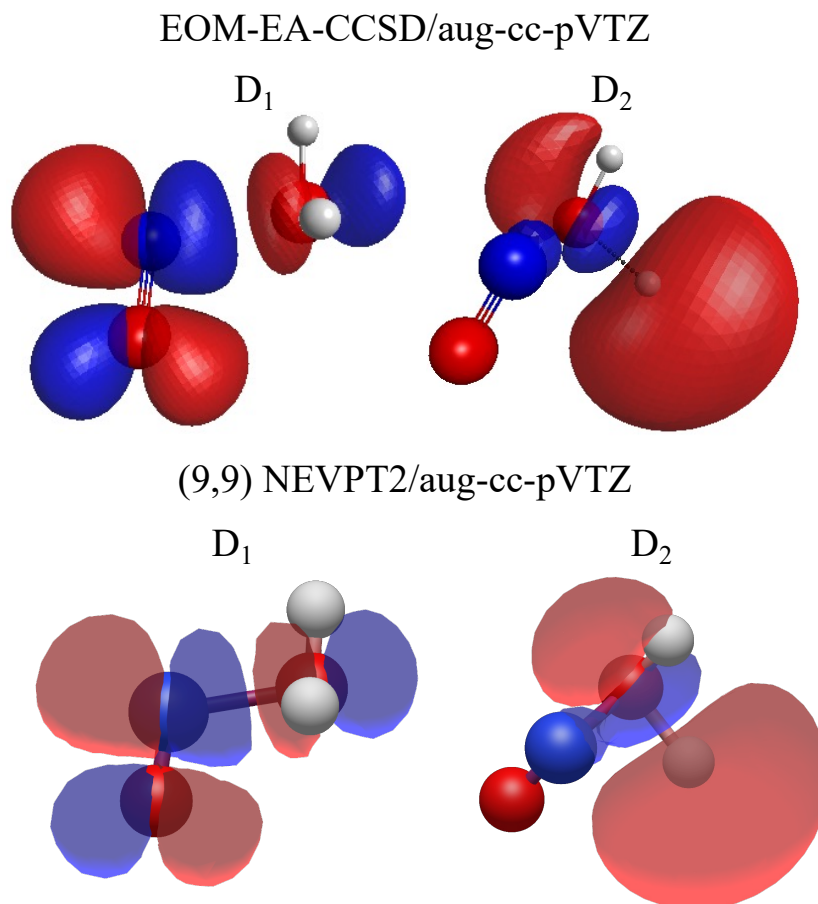

**Figure S3.** Singly occupied molecular orbitals (SOMOs) of D<sub>1</sub> and D<sub>2</sub> as calculated using the EOM-EA-CCSD/aug-cc-pVTZ and (9,9) NEVPT2/aug-cc-pVTZ levels of theory at an EOM-EA-CCSD/aug-cc-pVTZ optimized geometry with  $R_{\text{ON}}=1.787$  Å and  $r_{\text{OHA}} = 1.30$  Å. For the EOM-EA-CCSD data, the SOMOs were obtained using natural transition orbital analysis and plotted using wxMacMolPlt.<sup>3,4</sup> For the (9,9) NEVPT2/aug-cc-pVTZ data, the SOMOs were plotted using Avogadro.<sup>5</sup> Note that the electronic characters of D<sub>1</sub> and D<sub>2</sub> are identical for both methods. In particular, the SOMO for the D<sub>2</sub> state is consistent with electron transfer from the NO and to the H<sub>2</sub>O.

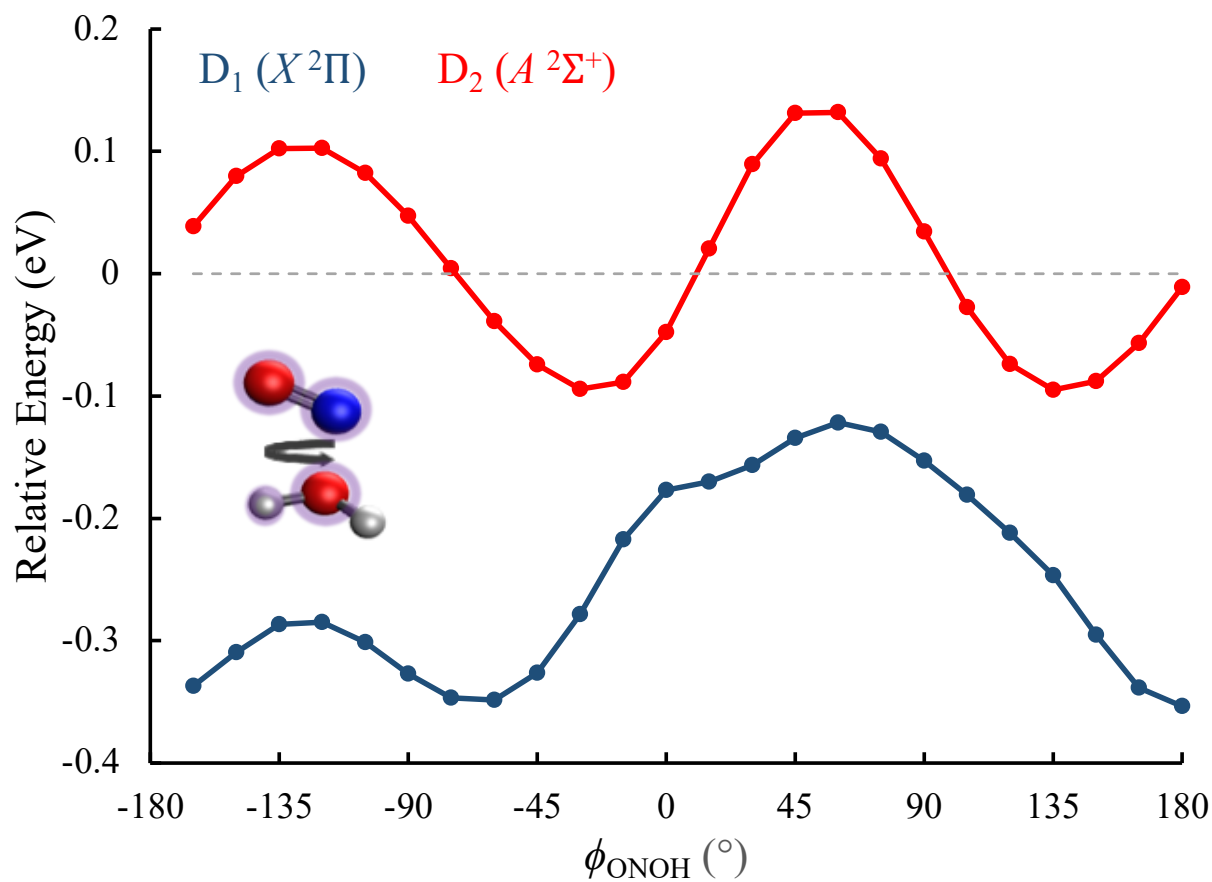

**Figure S4.** Cuts of the adiabatic PESs of the  $D_2 (A^2\Sigma^+)$  and  $D_1 (X^2\Pi)$  states for  $\text{ON}+\text{H}_2\text{O}$  as a function of torsion angles  $-165^{\circ} \leq \phi_{\text{ONOH}} \leq 180^{\circ}$  at a fixed intermolecular distance of  $R_{\text{ON}} = 1.56 \text{ \AA}$ . All energies are reported relative to  $D_2 (A^2\Sigma^+)$  at  $R_{\text{ON}} = 10 \text{ \AA}$ . The calculations were performed at the EOM-EA-CCSD/d-aug-cc-pVTZ//EOM-EA-CCSD/aug-cc-pVTZ level of theory.

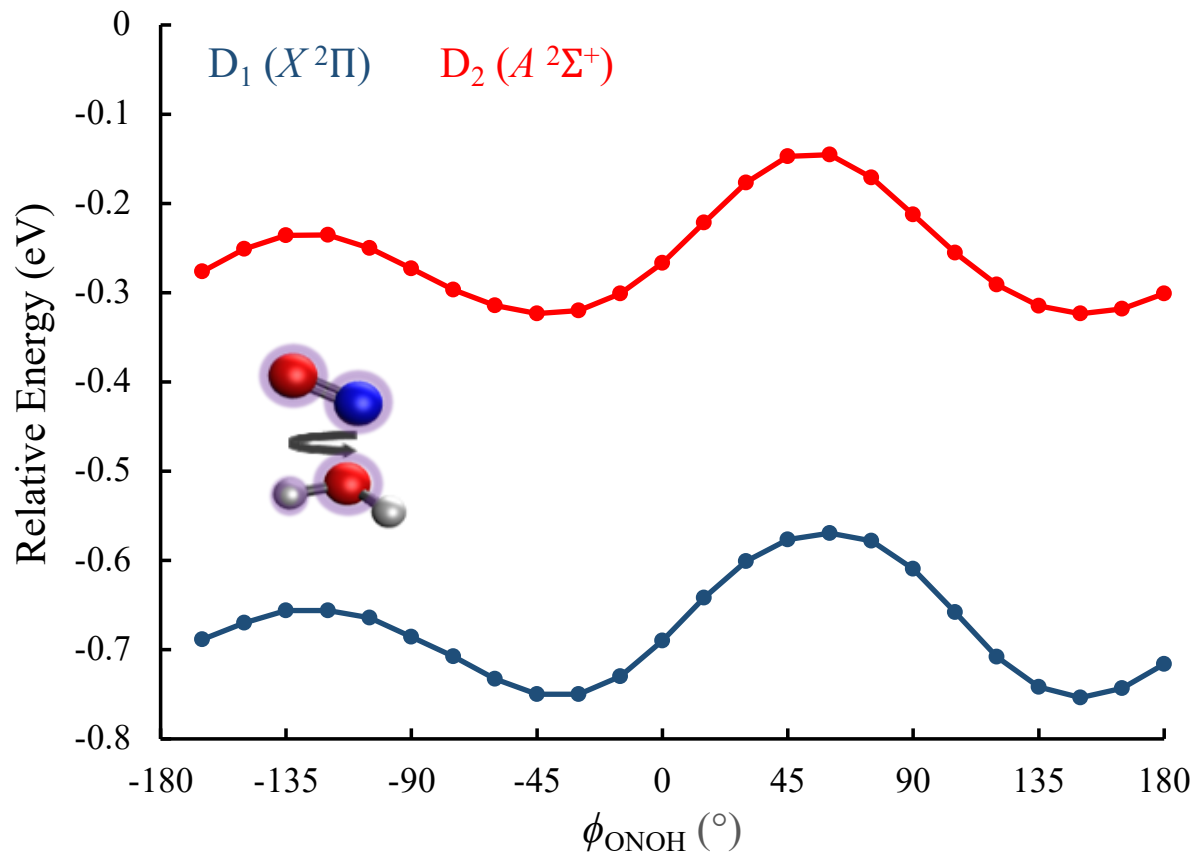

**Figure S5:** Cuts of the adiabatic PESs of the  $D_2 (A^2\Sigma^+)$  and  $D_1 (X^2\Pi)$  states for  $\text{ON}+\text{H}_2\text{O}$  as a function of torsion angles  $-165^{\circ} \leq \phi_{\text{ONOH}} \leq 180^{\circ}$  at a fixed intermolecular distance of  $R_{\text{ON}} = 1.61 \text{ \AA}$ . All energies are reported relative to  $D_2 (A^2\Sigma^+)$  at  $R_{\text{ON}} = 10 \text{ \AA}$ . The calculations were performed at the EOM-EA-CCSD/d-aug-cc-pVTZ//EOM-EA-CCSD/aug-cc-pVTZ level of theory.

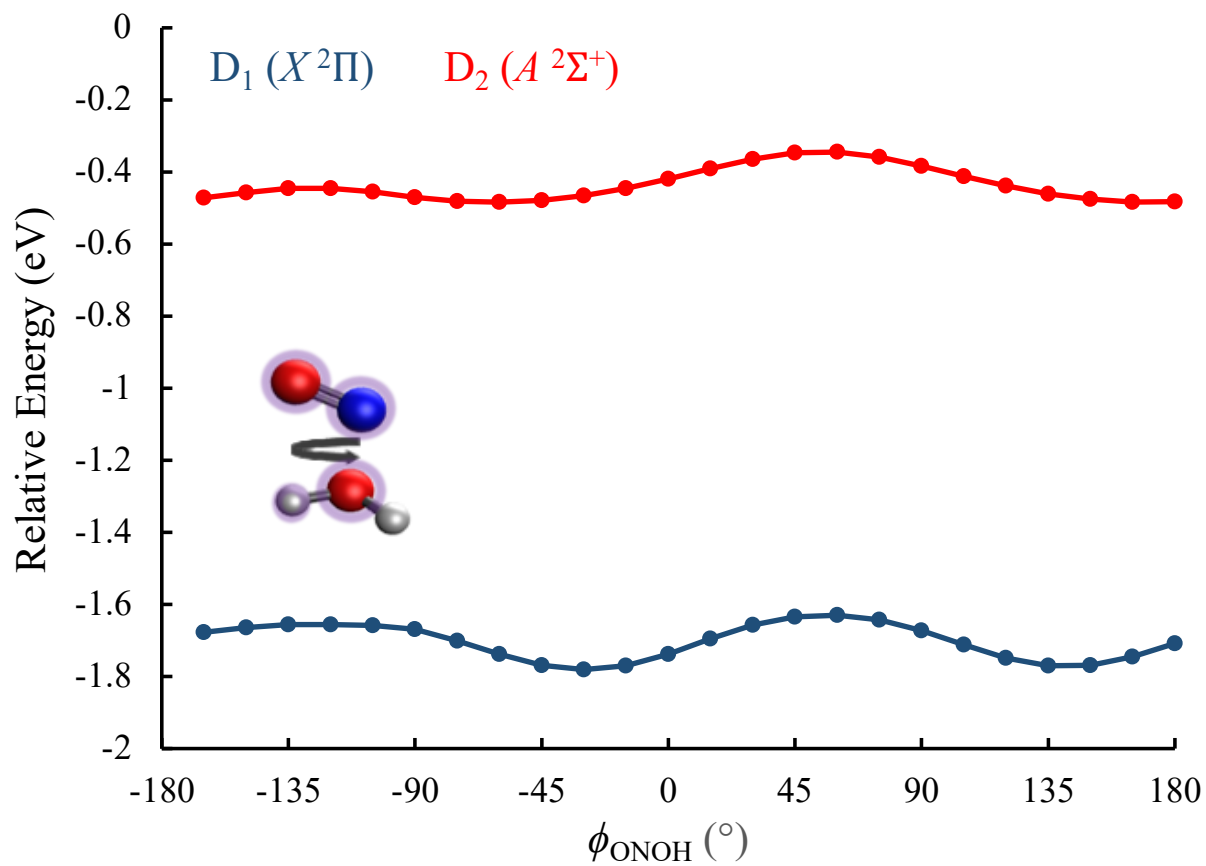

**Figure S6:** Cuts of the adiabatic PESs of the  $D_2 (A^2\Sigma^+)$  and  $D_1 (X^2\Pi)$  states for  $\text{ON}+\text{H}_2\text{O}$  as a function of torsion angles  $-165^\circ \leq \phi_{\text{ONOH}} \leq 180^\circ$  at a fixed intermolecular distance of  $R_{\text{ON}} = 1.71$  Å. All energies are reported relative to  $D_2 (A^2\Sigma^+)$  at  $R_{\text{ON}} = 10$  Å. The calculations were performed at the EOM-EA-CCSD/d-aug-cc-pVTZ//EOM-EA-CCSD/aug-cc-pVTZ level of theory.



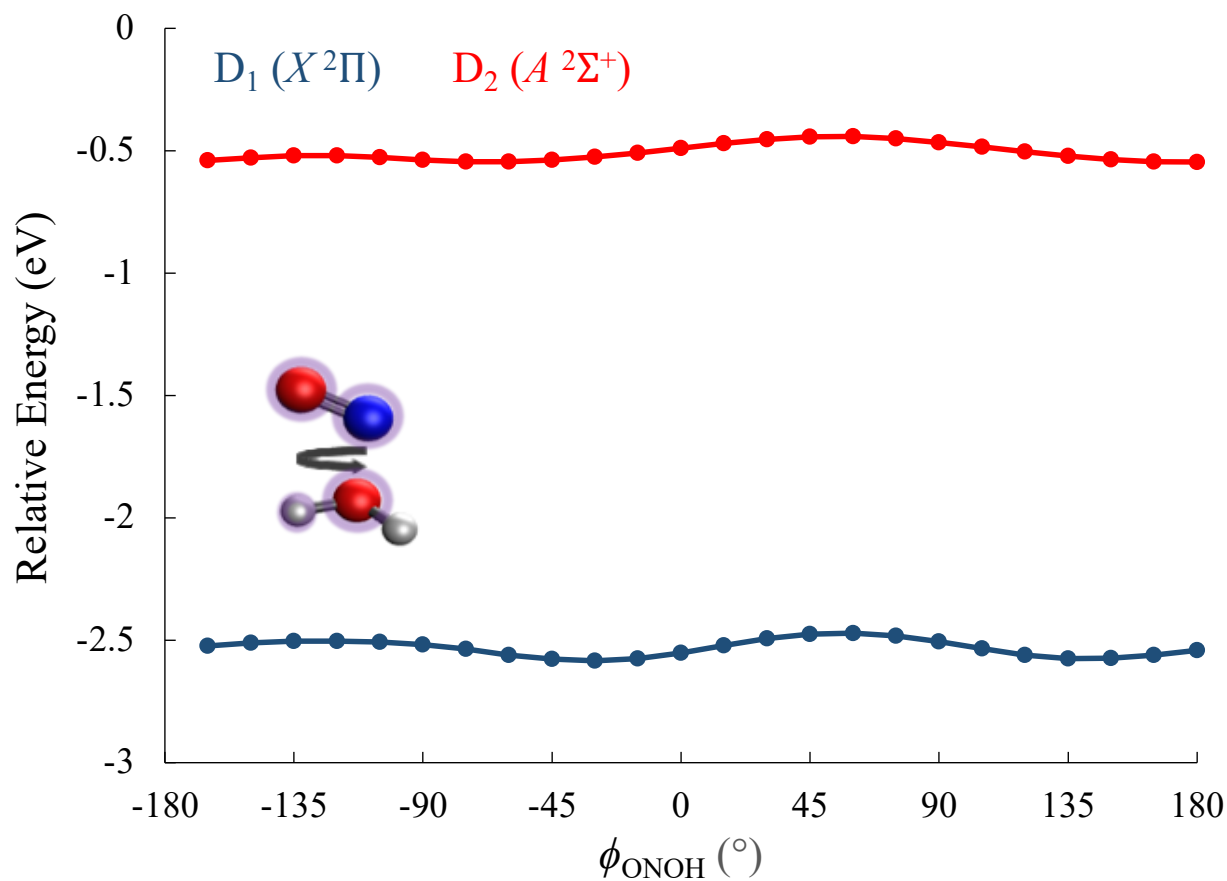

**Figure S7:** Cuts of the adiabatic PESs of the  $D_2 (A^2\Sigma^+)$  and  $D_1 (X^2\Pi)$  states for  $\text{ON}+\text{H}_2\text{O}$  as a function of torsion angles  $-165^\circ \leq \phi_{\text{ONOH}} \leq 180^\circ$  at a fixed intermolecular distance of  $R_{\text{ON}} = 1.81 \text{ \AA}$ . All energies are reported relative to  $D_2 (A^2\Sigma^+)$  at  $R_{\text{ON}} = 10 \text{ \AA}$ . The calculations were performed at the EOM-EA-CCSD/d-aug-cc-pVTZ//EOM-EA-CCSD/aug-cc-pVTZ level of theory.

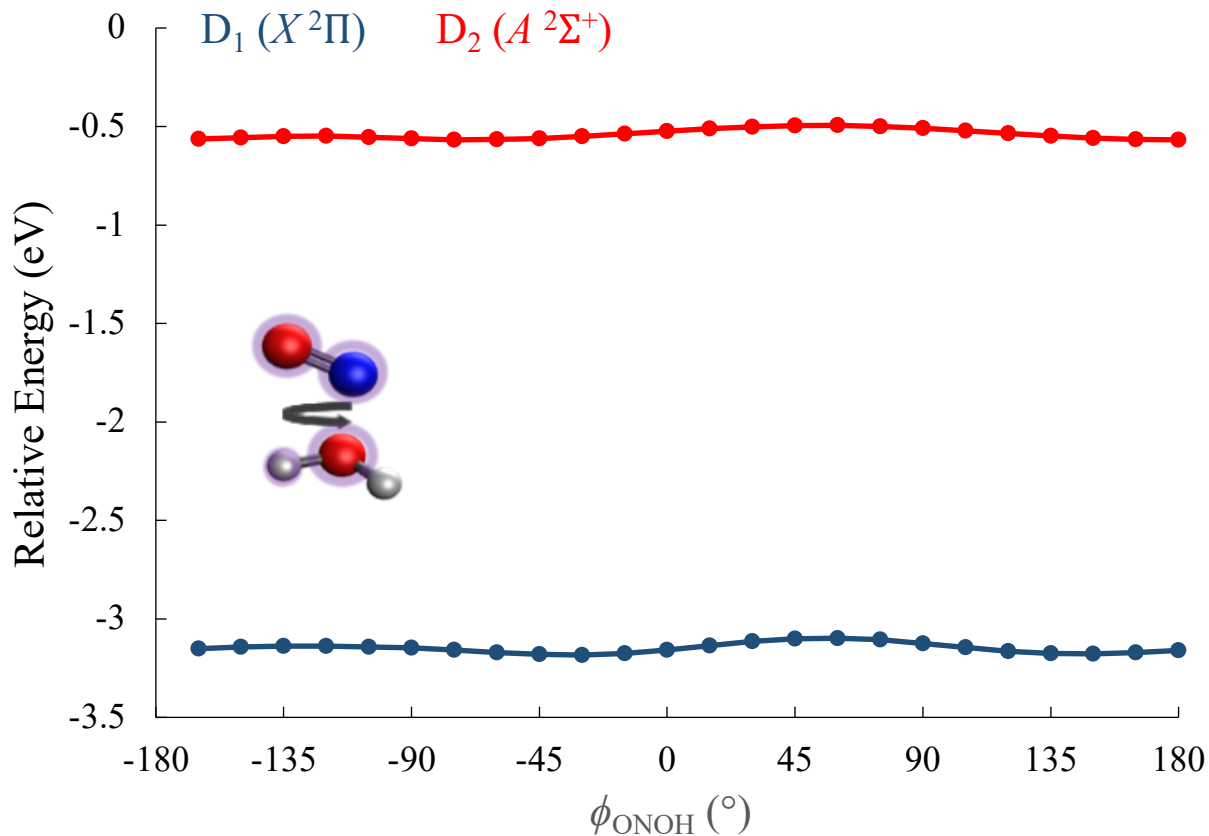

**Figure S8:** Cuts of the adiabatic PESs of the  $D_2 (A^2\Sigma^+)$  and  $D_1 (X^2\Pi)$  states for  $\text{ON}+\text{H}_2\text{O}$  as a function of torsion angles  $-165^{\circ} \leq \phi_{\text{ONOH}} \leq 180^{\circ}$  at a fixed intermolecular distance of  $R_{\text{ON}} = 1.91 \text{ \AA}$ . All energies are reported relative to  $D_2 (A^2\Sigma^+)$  at  $R_{\text{ON}} = 10 \text{ \AA}$ . The calculations were performed at the EOM-EA-CCSD/d-aug-cc-pVTZ//EOM-EA-CCSD/aug-cc-pVTZ level of theory.

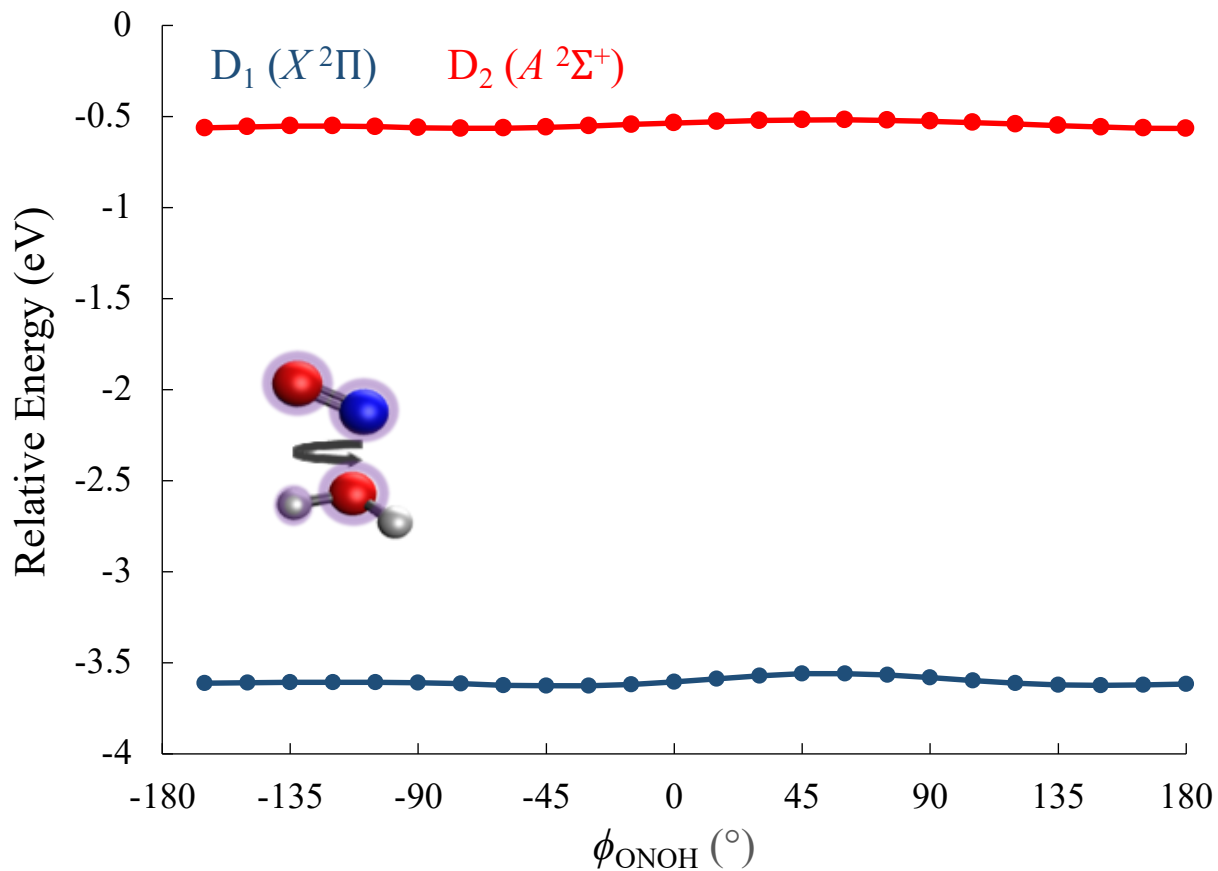

**Figure S9:** Cuts of the adiabatic PESs of the  $D_2 (A^2\Sigma^+)$  and  $D_1 (X^2\Pi)$  states for  $\text{ON}+\text{H}_2\text{O}$  as a function of torsion angles  $-165^{\circ} \leq \phi_{\text{ONOH}} \leq 180^{\circ}$  at a fixed intermolecular distance of  $R_{\text{ON}} = 2.01 \text{ \AA}$ . All energies are reported relative to  $D_2 (A^2\Sigma^+)$  at  $R_{\text{ON}} = 10 \text{ \AA}$ . The calculations were performed at the EOM-EA-CCSD/d-aug-cc-pVTZ//EOM-EA-CCSD/aug-cc-pVTZ level of theory.

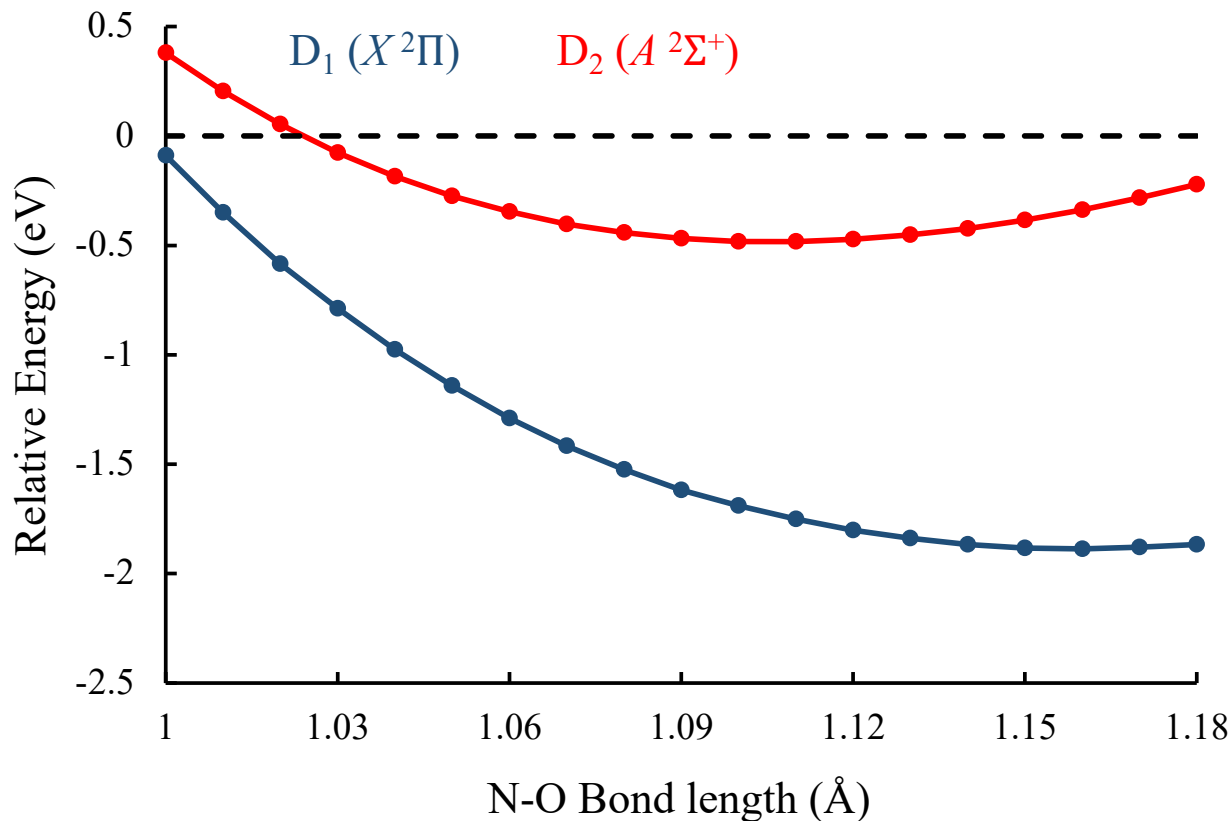

**Figure S10:** Cuts of the adiabatic PESs of the  $D_1$  ( $X^2\Pi$ ) and  $D_2$  ( $A^2\Sigma^+$ ) states for  $\text{NO}+\text{H}_2\text{O}$  as a function of N-O bond length at a fixed intermolecular distance  $R_{\text{ON}} = 1.71 \text{ \AA}$ . All energies are reported relative to  $D_2$  ( $A^2\Sigma^+$ ) at  $R_{\text{ON}} = 10 \text{ \AA}$ . The calculations were performed at the EOM-EA-CCSD/d-aug-cc-pVTZ//EOM-EA-CCSD/aug-cc-pVTZ level of theory.

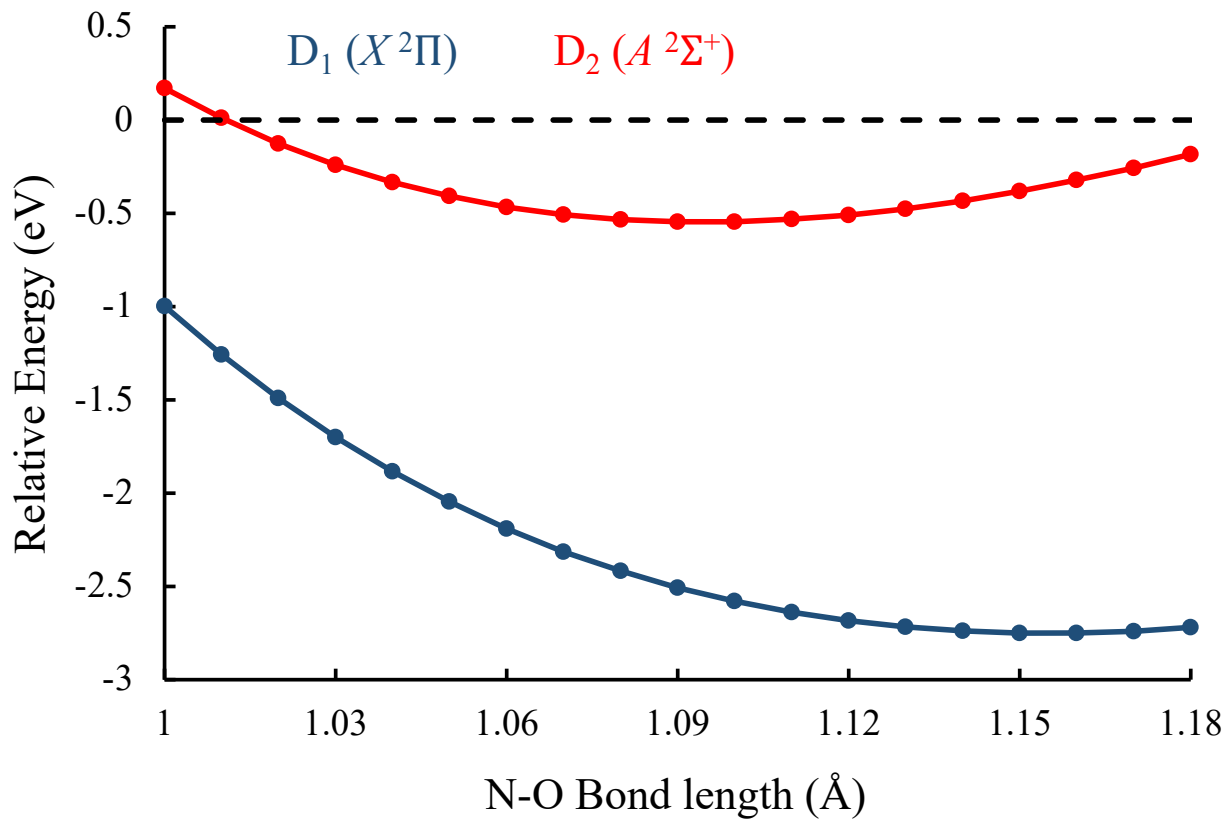

**Figure S11:** Cuts of the adiabatic PESs of the  $D_1$  ( $X^2\Pi$ ) and  $D_2$  ( $A^2\Sigma^+$ ) states for  $\text{NO}+\text{H}_2\text{O}$  as a function of N-O bond length at a fixed intermolecular distance  $R_{\text{ON}} = 1.81$  Å. All energies are reported relative to  $D_2$  ( $A^2\Sigma^+$ ) at  $R_{\text{ON}} = 10$  Å. The calculations were performed at the EOM-EA-CCSD/d-aug-cc-pVTZ//EOM-EA-CCSD/aug-cc-pVTZ level of theory.

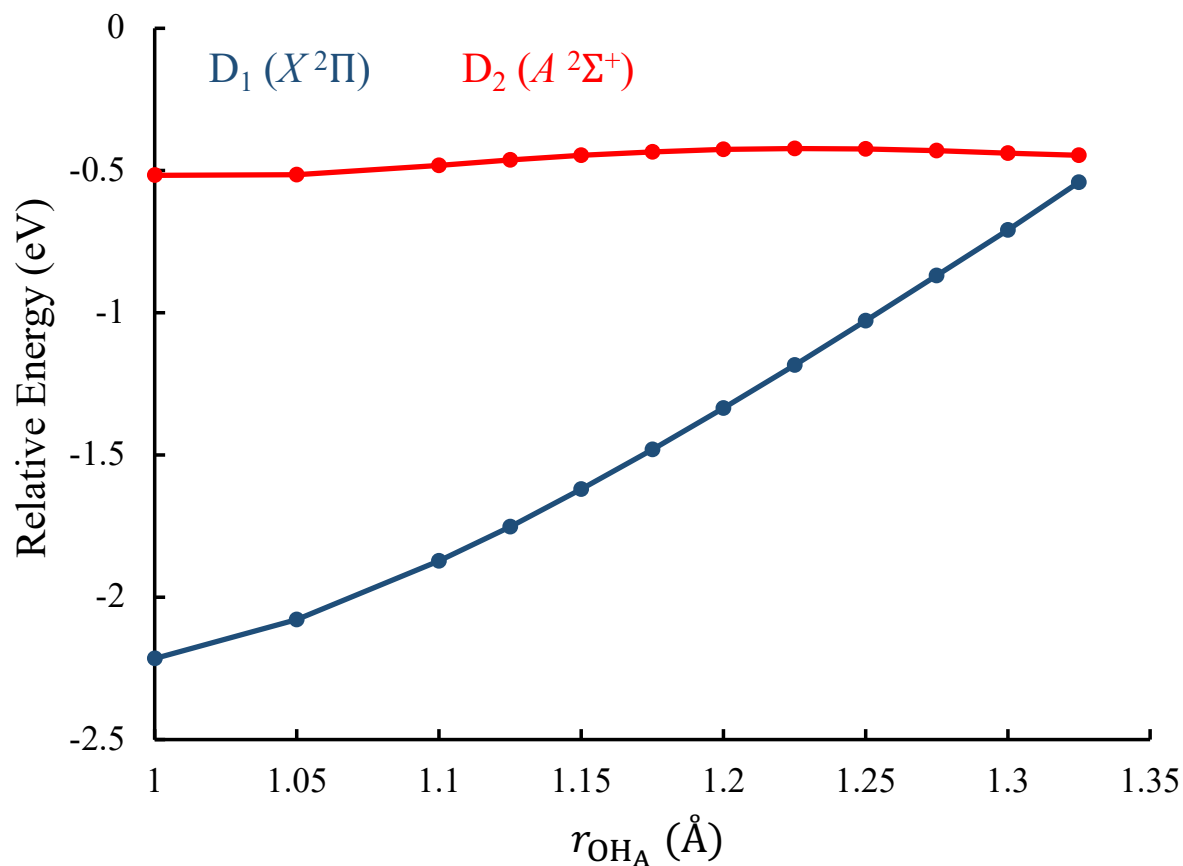

**Figure S12.** Cuts of the adiabatic PESs of the  $D_1$  ( $X^2\Pi$ ) and  $D_2$  ( $A^2\Sigma^+$ ) states for  $\text{NO}+\text{H}_2\text{O}$  as a function of the O-H bond length that is nearly perpendicular to the NO,  $r_{\text{OH}_A}$  at a fixed  $R_{\text{ON}} = 1.76$  Å. All energies are reported relative to  $D_2$  ( $A^2\Sigma^+$ ) at  $R_{\text{ON}} = 10$  Å. The calculations were performed at the EOM-EA-CCSD/d-aug-cc-pVTZ//EOM-EA-CCSD/aug-cc-pVTZ level of theory.

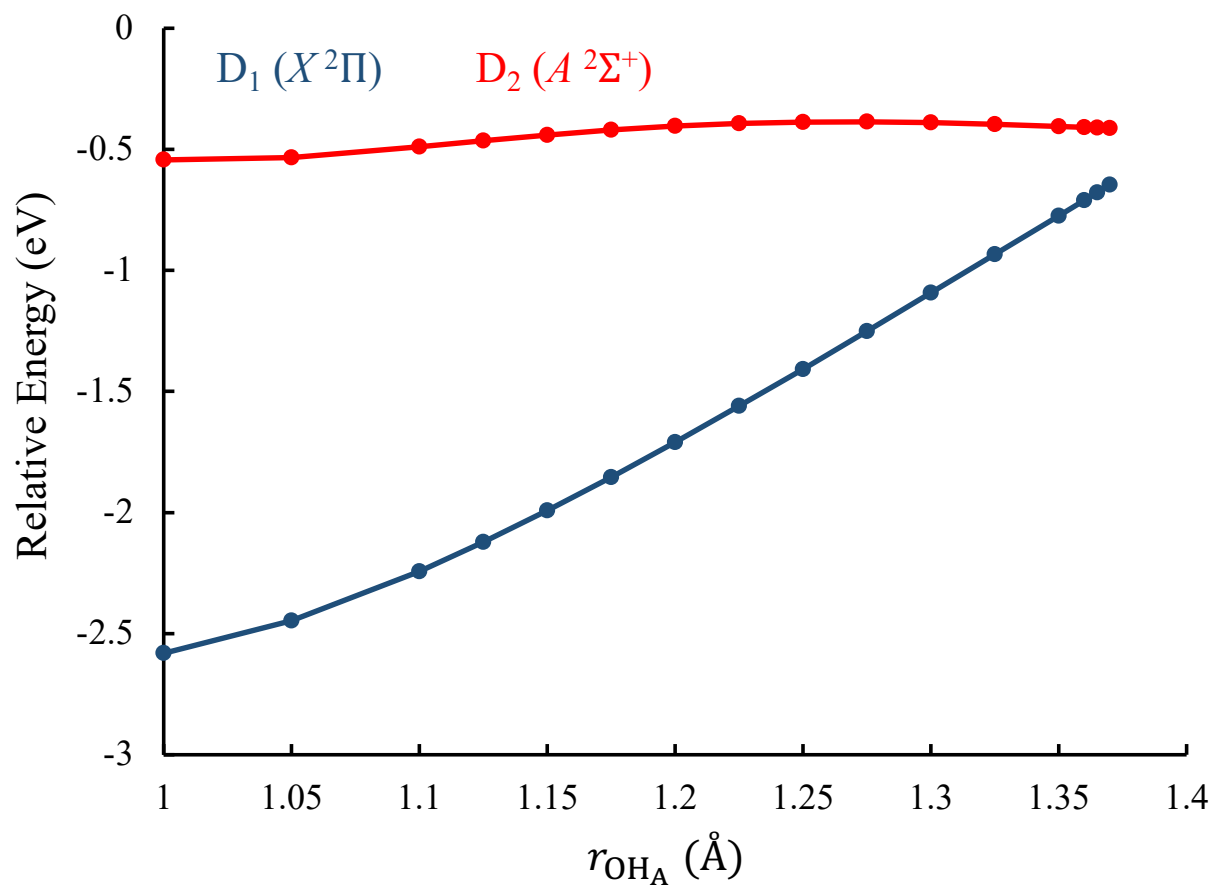

**Figure S13.** Cuts of the adiabatic PESs of the  $D_1 (X^2\Pi)$  and  $D_2 (A^2\Sigma^+)$  states for  $\text{NO}+\text{H}_2\text{O}$  as a function of the O-H bond length that is nearly perpendicular to the NO,  $r_{\text{OH}_A}$  at a fixed  $R_{\text{ON}} = 1.81 \text{ \AA}$ . All energies are reported relative to  $D_2 (A^2\Sigma^+)$  at  $R_{\text{ON}} = 10 \text{ \AA}$ . The calculations were performed at the EOM-EA-CCSD/d-aug-cc-pVTZ//EOM-EA-CCSD/aug-cc-pVTZ level of theory.

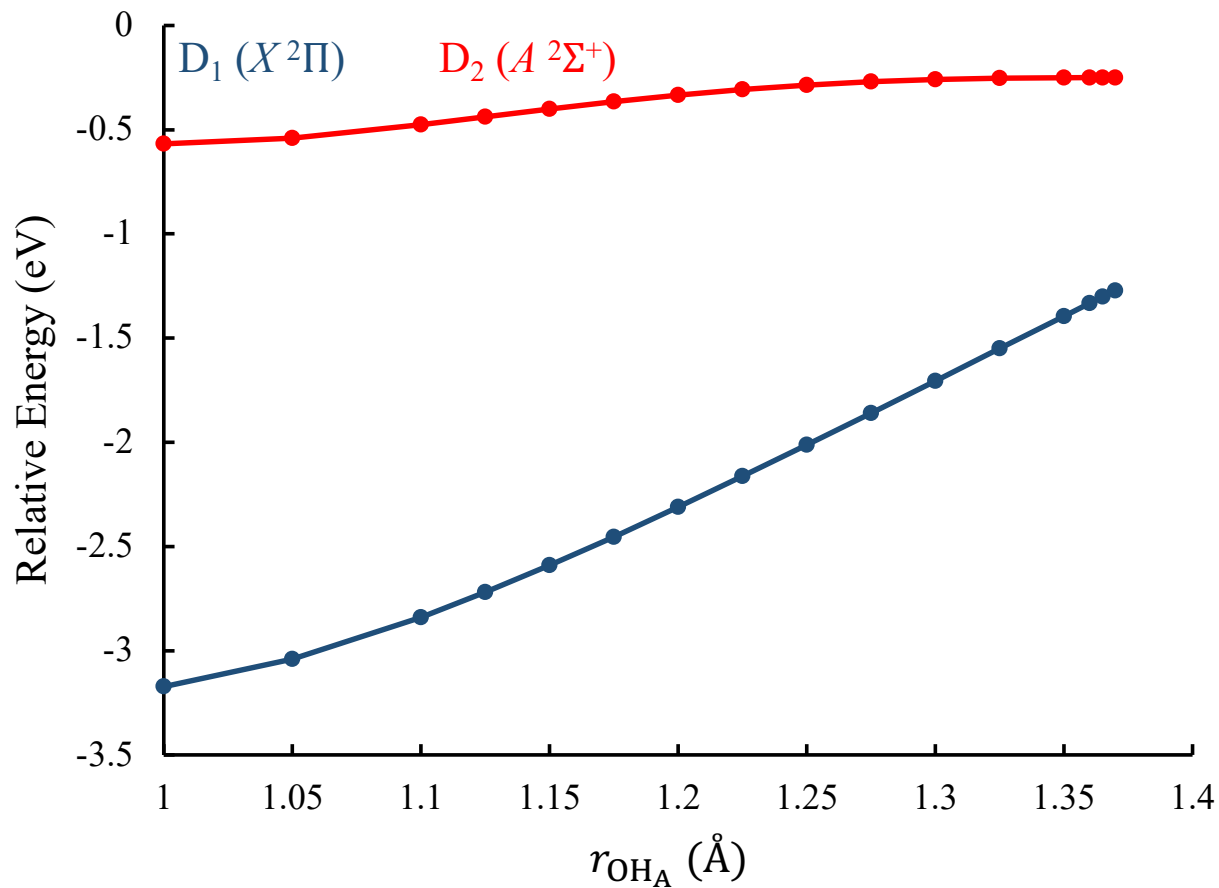

**Figure S14.** Cuts of the adiabatic PESs of the  $D_1 (X^2\Pi)$  and  $D_2 (A^2\Sigma^+)$  states for  $\text{NO}+\text{H}_2\text{O}$  as a function of the O-H bond length that is nearly perpendicular to the NO,  $r_{\text{OH}_A}$  at a fixed  $R_{\text{ON}} = 1.91 \text{ \AA}$ . All energies are reported relative to  $D_2 (A^2\Sigma^+)$  at  $R_{\text{ON}} = 10 \text{ \AA}$ . The calculations were performed at the EOM-EA-CCSD/d-aug-cc-pVTZ//EOM-EA-CCSD/aug-cc-pVTZ level of theory.



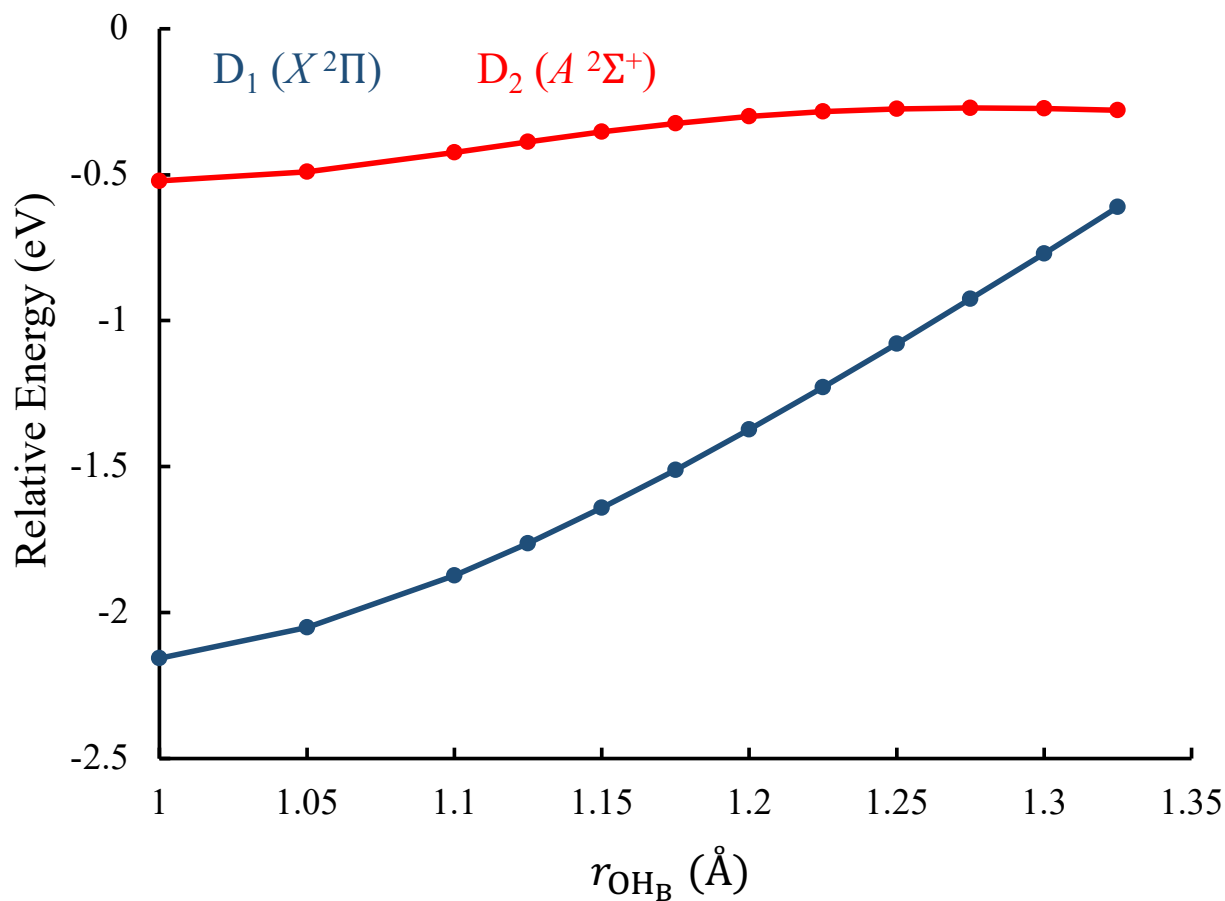

**Figure S15.** Cuts of the adiabatic PESs of the  $D_1 (X^2\Pi)$  and  $D_2 (A^2\Sigma^+)$  states for  $\text{NO}+\text{H}_2\text{O}$  as a function of the O-H bond length that is nearly parallel to the NO,  $r_{\text{OH}_B}$  at a fixed  $R_{\text{ON}} = 1.76 \text{ \AA}$ . All energies are reported relative to  $D_2 (A^2\Sigma^+)$  at  $R_{\text{ON}} = 10 \text{ \AA}$ . The calculations were performed at the EOM-EA-CCSD/d-aug-cc-pVTZ//EOM-EA-CCSD/aug-cc-pVTZ level of theory.

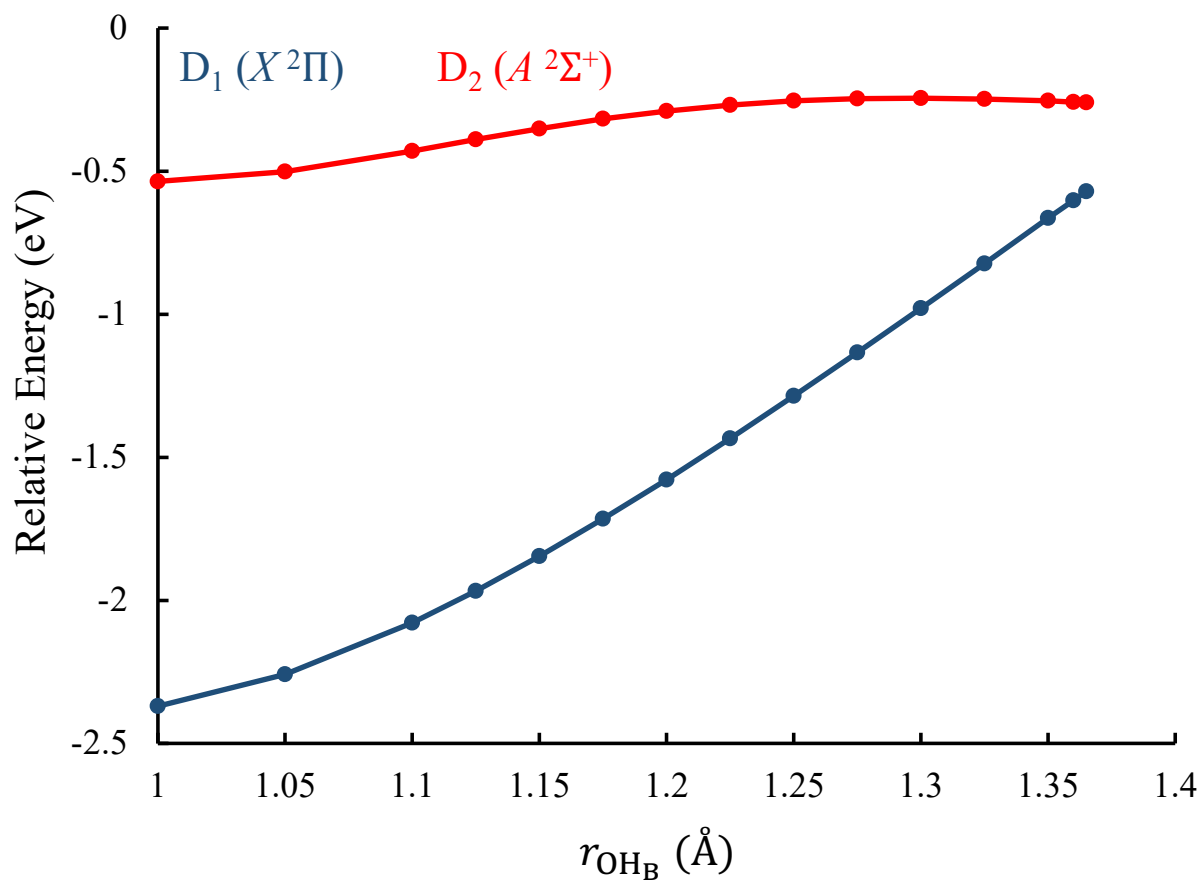

**Figure S16.** Cuts of the adiabatic PESs of the  $D_1$  ( $X^2\Pi$ ) and  $D_2$  ( $A^2\Sigma^+$ ) states for  $\text{NO}+\text{H}_2\text{O}$  as a function of the O-H bond length that is nearly parallel to the NO,  $r_{\text{OH}_B}$  at a fixed  $R_{\text{ON}} = 1.787$  Å. All energies are reported relative to  $D_2$  ( $A^2\Sigma^+$ ) at  $R_{\text{ON}} = 10$  Å. The calculations were performed at the EOM-EA-CCSD/d-aug-cc-pVTZ//EOM-EA-CCSD/aug-cc-pVTZ level of theory.

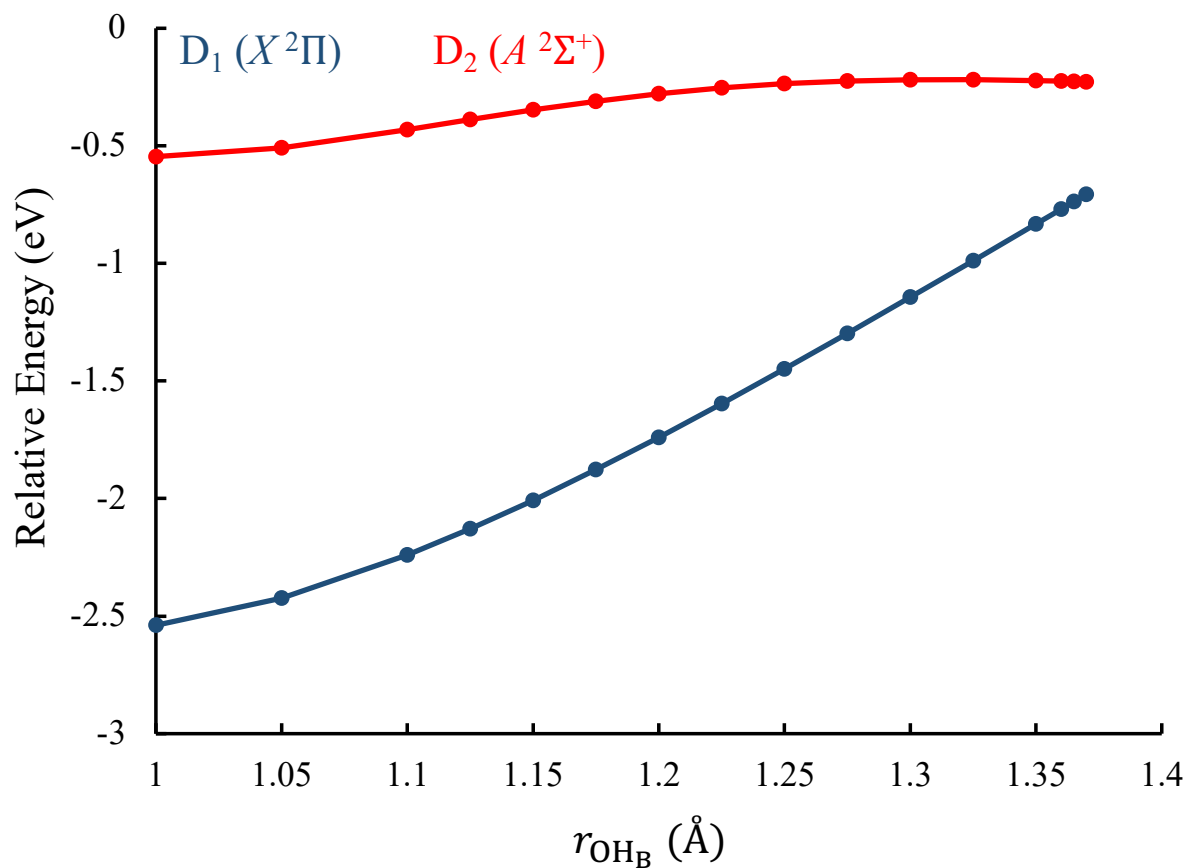

**Figure S17.** Cuts of the adiabatic PESs of the  $D_1 (X^2\Pi)$  and  $D_2 (A^2\Sigma^+)$  states for  $\text{NO}+\text{H}_2\text{O}$  as a function of the O-H bond length that is nearly parallel to the NO,  $r_{\text{OH}_B}$  at a fixed  $R_{\text{ON}} = 1.81 \text{ \AA}$ . All energies are reported relative to  $D_2 (A^2\Sigma^+)$  at  $R_{\text{ON}} = 10 \text{ \AA}$ . The calculations were performed at the EOM-EA-CCSD/d-aug-cc-pVTZ//EOM-EA-CCSD/aug-cc-pVTZ level of theory.

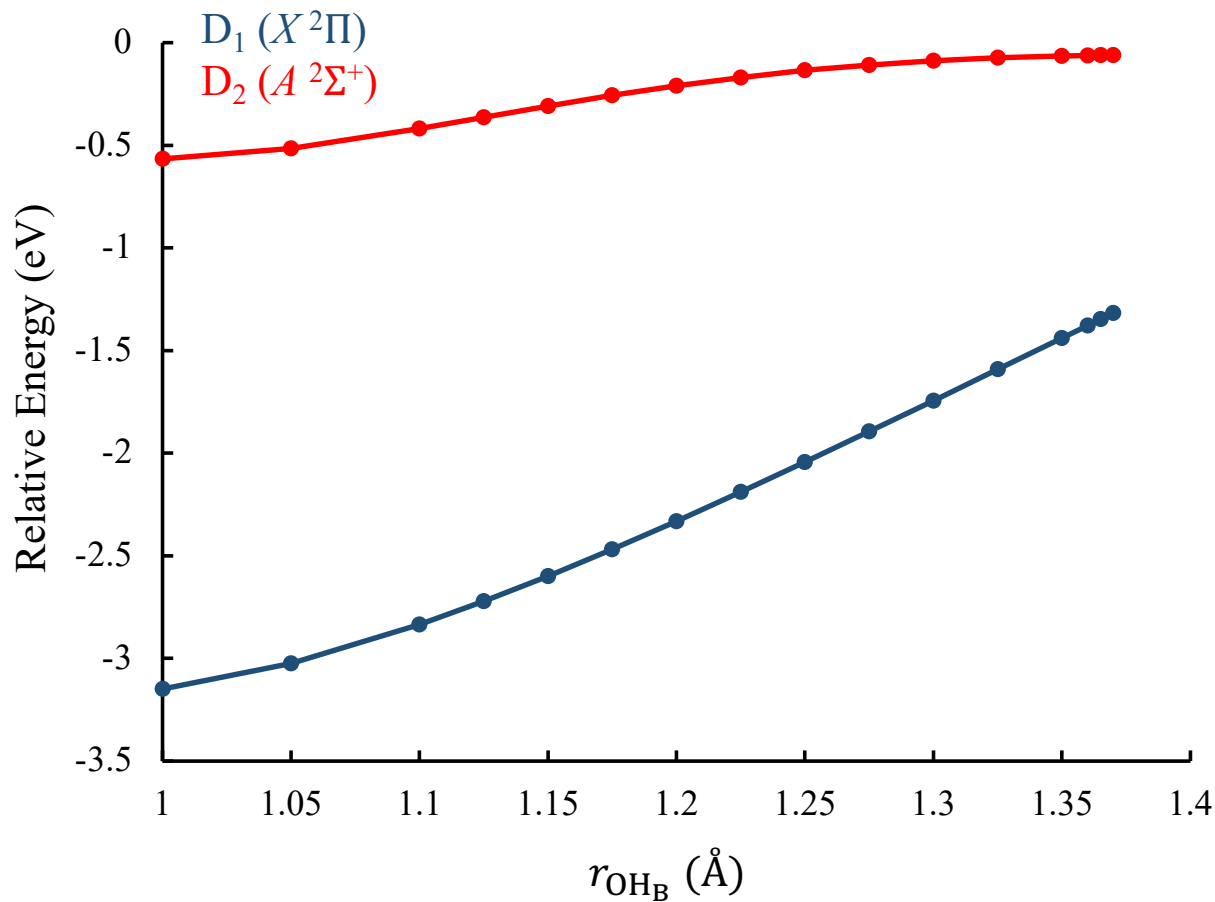

**Figure S18.** Cuts of the adiabatic PESs of the  $D_1$  ( $X^2\Pi$ ) and  $D_2$  ( $A^2\Sigma^+$ ) states for  $\text{NO}+\text{H}_2\text{O}$  as a function of the O-H bond length that is nearly parallel to the NO,  $r_{\text{OH}_B}$  at a fixed  $R_{\text{ON}} = 1.91$  Å. All energies are reported relative to  $D_2$  ( $A^2\Sigma^+$ ) at  $R_{\text{ON}} = 10$  Å. The calculations were performed at the EOM-EA-CCSD/d-aug-cc-pVTZ//EOM-EA-CCSD/aug-cc-pVTZ level of theory.

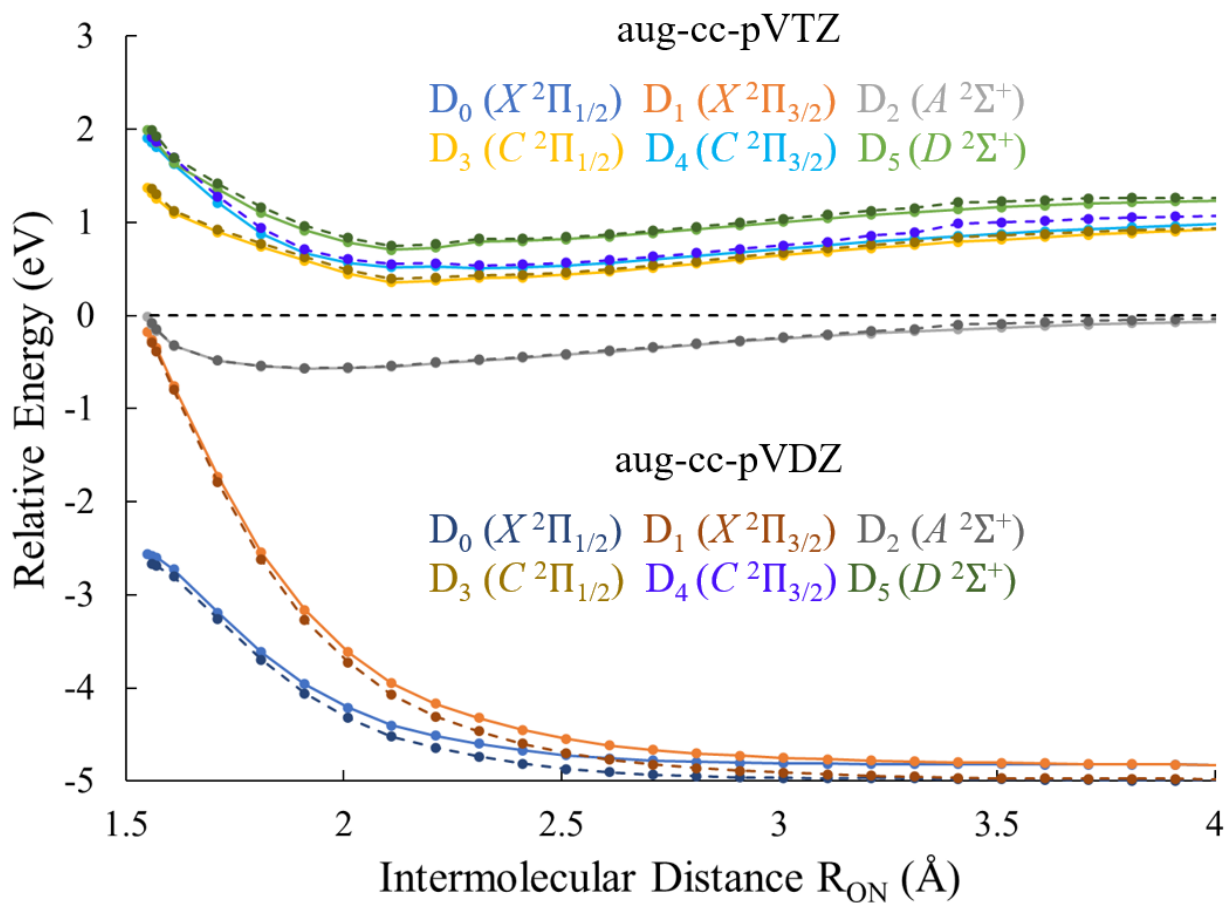

**Figure S19:** Cuts of the adiabatic PESs of the first six lowest electronic states for NO+H<sub>2</sub>O as a function of intermolecular distance,  $R_{ON}$ . The PESs represent benchmarking between two different basis sets used for the geometry optimizations. All energies are reported relative to  $D_2$  ( $A^2\Sigma^+$ ) at  $R_{ON} = 10$  Å. The calculations were performed at the EOM-EA-CCSD/d-aug-cc-pVTZ//EOM-EA-CCSD/aug-cc-pVTZ level of theory for the solid curves and at the EOM-EA-CCSD/d-aug-cc-pVTZ//EOM-EA-CCSD/aug-cc-pVDZ level of theory for the dashed curves.

**Table S1:** Relative electronic energies of the first six electronic states for NO+H<sub>2</sub>O as a function of the distance between the N of NO and the O of H<sub>2</sub>O, R<sub>ON</sub>. This intermolecular distance is the only constraint for these geometry optimizations; all other degrees of freedom were optimized on D<sub>2</sub>. These states are labeled based on their electronic character at R<sub>ON</sub> = 10 Å. The calculations were performed at the EOM-EA-CCSD/d-aug-cc-pVTZ//EOM-EA-CCSD/aug-cc-pVDZ level of theory.

| R <sub>ON</sub> (Å) | D <sub>0</sub> (eV) | D <sub>1</sub> (eV) | D <sub>2</sub> (eV) | D <sub>3</sub> (eV) | D <sub>4</sub> (eV) | D <sub>5</sub> (eV) |
|---------------------|---------------------|---------------------|---------------------|---------------------|---------------------|---------------------|
| 1.51                | -1.93               | 0.29                | 0.43                | 2.17                | 2.61                | 2.68                |
| 1.515               | -2.30               | 0.05                | 0.37                | 1.79                | 2.26                | 2.35                |
| 1.52                | -2.52               | -0.03               | 0.30                | 1.60                | 2.10                | 2.22                |
| 1.53                | -2.60               | -0.07               | 0.19                | 1.52                | 2.05                | 2.16                |
| 1.54                | -2.64               | -0.13               | 0.09                | 1.47                | 2.01                | 2.11                |
| 1.545               | -2.65               | -0.17               | 0.04                | 1.45                | 1.99                | 2.08                |
| 1.56                | -2.67               | -0.29               | -0.08               | 1.36                | 1.92                | 1.99                |
| 1.57                | -2.69               | -0.39               | -0.15               | 1.30                | 1.87                | 1.93                |
| 1.61                | -2.80               | -0.80               | -0.32               | 1.13                | 1.69                | 1.70                |
| 1.71                | -3.26               | -1.79               | -0.48               | 0.92                | 1.28                | 1.42                |
| 1.81                | -3.70               | -2.62               | -0.54               | 0.77                | 0.94                | 1.16                |
| 1.91                | -4.06               | -3.27               | -0.56               | 0.63                | 0.71                | 0.97                |
| 2.01                | -4.32               | -3.73               | -0.56               | 0.49                | 0.61                | 0.84                |
| 2.11                | -4.52               | -4.07               | -0.54               | 0.39                | 0.55                | 0.75                |
| 2.21                | -4.64               | -4.31               | -0.50               | 0.41                | 0.56                | 0.77                |
| 2.31                | -4.74               | -4.47               | -0.48               | 0.43                | 0.54                | 0.82                |
| 2.41                | -4.82               | -4.60               | -0.45               | 0.44                | 0.55                | 0.83                |
| 2.51                | -4.87               | -4.70               | -0.41               | 0.46                | 0.57                | 0.85                |
| 2.61                | -4.91               | -4.77               | -0.38               | 0.50                | 0.60                | 0.87                |
| 2.71                | -4.93               | -4.82               | -0.34               | 0.54                | 0.63                | 0.91                |
| 2.81                | -4.95               | -4.86               | -0.30               | 0.58                | 0.67                | 0.95                |
| 2.91                | -4.96               | -4.89               | -0.27               | 0.63                | 0.71                | 1.00                |
| 3.01                | -4.97               | -4.91               | -0.23               | 0.68                | 0.75                | 1.04                |
| 3.11                | -4.97               | -4.93               | -0.20               | 0.72                | 0.79                | 1.08                |
| 3.21                | -4.97               | -4.94               | -0.17               | 0.76                | 0.86                | 1.12                |
| 3.31                | -4.97               | -4.95               | -0.15               | 0.79                | 0.89                | 1.15                |
| 3.41                | -4.98               | -4.97               | -0.10               | 0.84                | 0.99                | 1.22                |
| 3.51                | -4.98               | -4.97               | -0.09               | 0.86                | 1.00                | 1.23                |
| 3.61                | -4.99               | -4.97               | -0.07               | 0.88                | 1.02                | 1.24                |
| 3.71                | -4.99               | -4.97               | -0.06               | 0.90                | 1.04                | 1.26                |
| 3.81                | -4.99               | -4.98               | -0.05               | 0.92                | 1.05                | 1.26                |
| 3.91                | -5.00               | -4.98               | -0.04               | 0.93                | 1.07                | 1.27                |
| 4.01                | -5.00               | -4.98               | -0.04               | 0.94                | 1.07                | 1.26                |
| 10.00               | -4.98               | -4.98               | 0.00                | 1.02                | 1.03                | 1.12                |

**Table S2:** Relative electronic energies of the first six electronic states for NO+H<sub>2</sub>O as a function of the distance between the N of NO and the O of H<sub>2</sub>O, R<sub>ON</sub>. This intermolecular distance is the only constraint for these geometry optimizations; all other degrees of freedom were optimized on D<sub>2</sub>. These states are labeled based on their electronic character at R<sub>ON</sub> = 10 Å. The calculations were performed at the EOM-EA-CCSD/d-aug-cc-pVTZ//EOM-EA-CCSD/aug-cc-pVTZ level of theory.

| R <sub>ON</sub> (Å) | D <sub>0</sub> (eV) | D <sub>1</sub> (eV) | D <sub>2</sub> (eV) | D <sub>3</sub> (eV) | D <sub>4</sub> (eV) | D <sub>5</sub> (eV) |
|---------------------|---------------------|---------------------|---------------------|---------------------|---------------------|---------------------|
| 1.51                | -2.27               | 0.07                | 0.41                | 1.73                | 2.18                | 2.28                |
| 1.515               | -2.43               | 0.01                | 0.36                | 1.59                | 2.07                | 2.19                |
| 1.53                | -2.53               | -0.06               | 0.18                | 1.48                | 1.99                | 2.10                |
| 1.54                | -2.55               | -0.11               | 0.08                | 1.43                | 1.95                | 2.05                |
| 1.545               | -2.56               | -0.14               | 0.03                | 1.40                | 1.93                | 2.02                |
| 1.55                | -2.57               | -0.18               | -0.02               | 1.37                | 1.91                | 1.99                |
| 1.56                | -2.58               | -0.26               | -0.10               | 1.31                | 1.86                | 1.92                |
| 1.57                | -2.60               | -0.35               | -0.16               | 1.26                | 1.81                | 1.86                |
| 1.61                | -2.73               | -0.75               | -0.32               | 1.10                | 1.63                | 1.64                |
| 1.71                | -3.19               | -1.73               | -0.48               | 0.90                | 1.21                | 1.36                |
| 1.81                | -3.62               | -2.55               | -0.55               | 0.74                | 0.88                | 1.10                |
| 1.91                | -3.96               | -3.16               | -0.57               | 0.59                | 0.67                | 0.91                |
| 2.01                | -4.21               | -3.62               | -0.57               | 0.45                | 0.57                | 0.79                |
| 2.11                | -4.40               | -3.95               | -0.55               | 0.36                | 0.52                | 0.71                |
| 2.21                | -4.51               | -4.17               | -0.51               | 0.38                | 0.53                | 0.73                |
| 2.31                | -4.60               | -4.32               | -0.49               | 0.40                | 0.51                | 0.80                |
| 2.41                | -4.67               | -4.45               | -0.46               | 0.41                | 0.52                | 0.80                |
| 2.51                | -4.72               | -4.55               | -0.42               | 0.44                | 0.54                | 0.82                |
| 2.61                | -4.76               | -4.62               | -0.39               | 0.47                | 0.57                | 0.85                |
| 2.71                | -4.78               | -4.67               | -0.35               | 0.51                | 0.60                | 0.89                |
| 2.81                | -4.80               | -4.70               | -0.31               | 0.56                | 0.64                | 0.92                |
| 2.91                | -4.80               | -4.73               | -0.28               | 0.60                | 0.68                | 0.97                |
| 3.01                | -4.81               | -4.75               | -0.25               | 0.65                | 0.72                | 1.01                |
| 3.11                | -4.81               | -4.77               | -0.22               | 0.69                | 0.76                | 1.05                |
| 3.21                | -4.82               | -4.78               | -0.19               | 0.73                | 0.79                | 1.08                |
| 3.31                | -4.82               | -4.79               | -0.17               | 0.76                | 0.82                | 1.11                |
| 3.41                | -4.82               | -4.80               | -0.15               | 0.79                | 0.85                | 1.14                |
| 3.51                | -4.82               | -4.81               | -0.13               | 0.82                | 0.88                | 1.16                |
| 3.61                | -4.82               | -4.81               | -0.11               | 0.84                | 0.90                | 1.18                |
| 3.71                | -4.82               | -4.82               | -0.10               | 0.87                | 0.93                | 1.20                |
| 3.81                | -4.82               | -4.82               | -0.08               | 0.89                | 0.95                | 1.21                |
| 3.91                | -4.82               | -4.82               | -0.07               | 0.91                | 0.97                | 1.22                |
| 4.01                | -4.83               | -4.83               | -0.06               | 0.92                | 0.98                | 1.23                |
| 10.00               | -4.82               | -4.82               | 0.00                | 1.02                | 1.02                | 1.13                |

**Table S3:** Relative electronic energies, of the first 6 electronic states, for NO+H<sub>2</sub>O as a function of torsion angles  $-165^\circ \leq \phi_{\text{ONOH}} \leq 180^\circ$  at a fixed intermolecular distance of  $R_{\text{ON}} = 1.56 \text{ \AA}$ . All energies are reported relative to  $D_2 (A^2\Sigma^+)$  at  $R_{\text{ON}} = 10 \text{ \AA}$ . The calculations were performed at the EOM-EA-CCSD/d-aug-cc-pVTZ//EOM-EA-CCSD/aug-cc-pVTZ level of theory.

| $\phi_{\text{ONOH}} (^\circ)$ | $D_0$ (eV) | $D_1$ (eV) | $D_2$ (eV) | $D_3$ (eV) | $D_4$ (eV) | $D_5$ (eV) |
|-------------------------------|------------|------------|------------|------------|------------|------------|
| -165                          | -2.62      | -0.34      | 0.04       | 1.27       | 1.85       | 1.99       |
| -150                          | -2.60      | -0.31      | 0.08       | 1.31       | 1.87       | 2.04       |
| -135                          | -2.59      | -0.29      | 0.10       | 1.34       | 1.88       | 2.08       |
| -120                          | -2.58      | -0.28      | 0.10       | 1.35       | 1.88       | 2.08       |
| -105                          | -2.59      | -0.30      | 0.08       | 1.32       | 1.88       | 2.06       |
| -90                           | -2.61      | -0.33      | 0.05       | 1.29       | 1.87       | 2.02       |
| -75                           | -2.62      | -0.35      | 0.00       | 1.26       | 1.86       | 1.97       |
| -60                           | -2.63      | -0.35      | -0.04      | 1.25       | 1.84       | 1.92       |
| -45                           | -2.63      | -0.33      | -0.07      | 1.26       | 1.83       | 1.90       |
| -30                           | -2.60      | -0.28      | -0.09      | 1.30       | 1.84       | 1.91       |
| -15                           | -2.55      | -0.22      | -0.09      | 1.34       | 1.89       | 1.95       |
| 0                             | -2.53      | -0.18      | -0.05      | 1.38       | 1.96       | 2.01       |
| 15                            | -2.57      | -0.17      | 0.02       | 1.40       | 2.00       | 2.08       |
| 30                            | -2.61      | -0.16      | 0.09       | 1.43       | 2.04       | 2.15       |
| 45                            | -2.62      | -0.13      | 0.13       | 1.46       | 2.07       | 2.21       |
| 60                            | -2.62      | -0.12      | 0.13       | 1.47       | 2.08       | 2.22       |
| 75                            | -2.59      | -0.13      | 0.09       | 1.46       | 2.07       | 2.19       |
| 90                            | -2.57      | -0.15      | 0.03       | 1.44       | 2.04       | 2.13       |
| 105                           | -2.55      | -0.18      | -0.03      | 1.40       | 1.99       | 2.05       |
| 120                           | -2.55      | -0.21      | -0.07      | 1.36       | 1.93       | 1.98       |
| 135                           | -2.57      | -0.25      | -0.09      | 1.32       | 1.87       | 1.93       |
| 150                           | -2.60      | -0.30      | -0.09      | 1.28       | 1.83       | 1.90       |
| 165                           | -2.63      | -0.34      | -0.06      | 1.24       | 1.82       | 1.89       |
| 180                           | -2.63      | -0.35      | -0.01      | 1.24       | 1.83       | 1.93       |



**Table S4:** Relative electronic energies, of the first 6 electronic states, for NO+H<sub>2</sub>O as a function of torsion angles  $-165^\circ \leq \phi_{\text{ONOH}} \leq 180^\circ$  at a fixed intermolecular distance of  $R_{\text{ON}} = 1.61 \text{ \AA}$ . All energies are reported relative to D<sub>2</sub> (A<sup>2</sup>Σ<sup>+</sup>) at  $R_{\text{ON}} = 10 \text{ \AA}$ . The calculations were performed at the EOM-EA-CCSD/d-aug-cc-pVTZ//EOM-EA-CCSD/aug-cc-pVTZ level of theory.

| $\phi_{\text{ONOH}} (\text{^\circ})$ | D <sub>0</sub> (eV) | D <sub>1</sub> (eV) | D <sub>2</sub> (eV) | D <sub>3</sub> (eV) | D <sub>4</sub> (eV) | D <sub>5</sub> (eV) |
|--------------------------------------|---------------------|---------------------|---------------------|---------------------|---------------------|---------------------|
| -165                                 | -2.72               | -0.69               | -0.28               | 1.11                | 1.66                | 1.78                |
| -150                                 | -2.72               | -0.67               | -0.25               | 1.13                | 1.65                | 1.81                |
| -135                                 | -2.71               | -0.66               | -0.24               | 1.15                | 1.65                | 1.83                |
| -120                                 | -2.71               | -0.66               | -0.24               | 1.15                | 1.65                | 1.83                |
| -105                                 | -2.71               | -0.66               | -0.25               | 1.14                | 1.66                | 1.83                |
| -90                                  | -2.72               | -0.69               | -0.27               | 1.12                | 1.67                | 1.79                |
| -75                                  | -2.73               | -0.71               | -0.30               | 1.10                | 1.66                | 1.75                |
| -60                                  | -2.74               | -0.73               | -0.31               | 1.09                | 1.65                | 1.69                |
| -45                                  | -2.73               | -0.75               | -0.32               | 1.09                | 1.63                | 1.65                |
| -30                                  | -2.71               | -0.75               | -0.32               | 1.11                | 1.63                | 1.64                |
| -15                                  | -2.69               | -0.73               | -0.30               | 1.13                | 1.66                | 1.67                |
| 0                                    | -2.68               | -0.69               | -0.27               | 1.17                | 1.71                | 1.74                |
| 15                                   | -2.68               | -0.64               | -0.22               | 1.20                | 1.77                | 1.84                |
| 30                                   | -2.69               | -0.60               | -0.18               | 1.23                | 1.81                | 1.92                |
| 45                                   | -2.70               | -0.58               | -0.15               | 1.25                | 1.83                | 1.97                |
| 60                                   | -2.70               | -0.57               | -0.15               | 1.26                | 1.84                | 1.98                |
| 75                                   | -2.68               | -0.58               | -0.17               | 1.26                | 1.83                | 1.96                |
| 90                                   | -2.66               | -0.61               | -0.21               | 1.24                | 1.81                | 1.90                |
| 105                                  | -2.66               | -0.66               | -0.26               | 1.20                | 1.76                | 1.81                |
| 120                                  | -2.68               | -0.71               | -0.29               | 1.16                | 1.69                | 1.72                |
| 135                                  | -2.71               | -0.74               | -0.31               | 1.12                | 1.65                | 1.66                |
| 150                                  | -2.73               | -0.75               | -0.32               | 1.10                | 1.63                | 1.64                |
| 165                                  | -2.74               | -0.74               | -0.32               | 1.08                | 1.64                | 1.67                |
| 180                                  | -2.73               | -0.72               | -0.30               | 1.09                | 1.65                | 1.73                |

**Table S5:** Relative electronic energies, of the first 6 electronic states, for NO+H<sub>2</sub>O as a function of torsion angles  $-165^\circ \leq \phi_{\text{ONOH}} \leq 180^\circ$  at a fixed intermolecular distance of  $R_{\text{ON}} = 1.71 \text{ \AA}$ . All energies are reported relative to  $D_2 (A^2\Sigma^+)$  at  $R_{\text{ON}} = 10 \text{ \AA}$ . The calculations were performed at the EOM-EA-CCSD/d-aug-cc-pVTZ//EOM-EA-CCSD/aug-cc-pVTZ level of theory.

| $\phi_{\text{ONOH}} (^\circ)$ | $D_0$ (eV) | $D_1$ (eV) | $D_2$ (eV) | $D_3$ (eV) | $D_4$ (eV) | $D_5$ (eV) |
|-------------------------------|------------|------------|------------|------------|------------|------------|
| -165                          | -3.17      | -1.68      | -0.47      | 0.90       | 1.23       | 1.41       |
| -150                          | -3.17      | -1.66      | -0.46      | 0.91       | 1.22       | 1.42       |
| -135                          | -3.18      | -1.66      | -0.45      | 0.92       | 1.21       | 1.43       |
| -120                          | -3.18      | -1.66      | -0.45      | 0.93       | 1.21       | 1.43       |
| -105                          | -3.17      | -1.66      | -0.46      | 0.92       | 1.22       | 1.43       |
| -90                           | -3.16      | -1.67      | -0.47      | 0.91       | 1.24       | 1.42       |
| -75                           | -3.18      | -1.70      | -0.48      | 0.90       | 1.23       | 1.39       |
| -60                           | -3.19      | -1.74      | -0.48      | 0.90       | 1.21       | 1.35       |
| -45                           | -3.20      | -1.77      | -0.48      | 0.90       | 1.19       | 1.32       |
| -30                           | -3.19      | -1.78      | -0.47      | 0.92       | 1.18       | 1.31       |
| -15                           | -3.18      | -1.77      | -0.45      | 0.94       | 1.20       | 1.34       |
| 0                             | -3.16      | -1.74      | -0.42      | 0.96       | 1.25       | 1.40       |
| 15                            | -3.15      | -1.70      | -0.39      | 0.98       | 1.30       | 1.47       |
| 30                            | -3.15      | -1.66      | -0.36      | 1.00       | 1.34       | 1.53       |
| 45                            | -3.16      | -1.63      | -0.35      | 1.01       | 1.36       | 1.57       |
| 60                            | -3.15      | -1.63      | -0.34      | 1.01       | 1.37       | 1.58       |
| 75                            | -3.15      | -1.64      | -0.36      | 1.01       | 1.36       | 1.56       |
| 90                            | -3.14      | -1.67      | -0.38      | 1.00       | 1.33       | 1.51       |
| 105                           | -3.15      | -1.71      | -0.41      | 0.98       | 1.28       | 1.44       |
| 120                           | -3.17      | -1.75      | -0.44      | 0.96       | 1.23       | 1.38       |
| 135                           | -3.18      | -1.77      | -0.46      | 0.94       | 1.20       | 1.34       |
| 150                           | -3.19      | -1.77      | -0.48      | 0.92       | 1.19       | 1.32       |
| 165                           | -3.19      | -1.75      | -0.48      | 0.90       | 1.21       | 1.34       |
| 180                           | -3.18      | -1.71      | -0.48      | 0.90       | 1.22       | 1.38       |

**Table S6:** Relative electronic energies, of the first 6 electronic states, for NO+H<sub>2</sub>O as a function of torsion angles  $-165^\circ \leq \phi_{\text{ONOH}} \leq 180^\circ$  at a fixed intermolecular distance of  $R_{\text{ON}} = 1.81 \text{ \AA}$ . All energies are reported relative to  $D_2 (A^2\Sigma^+)$  at  $R_{\text{ON}} = 10 \text{ \AA}$ . The calculations were performed at the EOM-EA-CCSD/d-aug-cc-pVTZ//EOM-EA-CCSD/aug-cc-pVTZ level of theory.

| $\phi_{\text{ONOH}} (^\circ)$ | $D_0$ (eV) | $D_1$ (eV) | $D_2$ (eV) | $D_3$ (eV) | $D_4$ (eV) | $D_5$ (eV) |
|-------------------------------|------------|------------|------------|------------|------------|------------|
| -165                          | -3.62      | -2.52      | -0.54      | 0.74       | 0.88       | 1.12       |
| -150                          | -3.62      | -2.51      | -0.53      | 0.74       | 0.87       | 1.13       |
| -135                          | -3.62      | -2.50      | -0.52      | 0.75       | 0.85       | 1.14       |
| -120                          | -3.62      | -2.50      | -0.52      | 0.76       | 0.85       | 1.14       |
| -105                          | -3.62      | -2.51      | -0.53      | 0.75       | 0.87       | 1.14       |
| -90                           | -3.62      | -2.52      | -0.54      | 0.74       | 0.88       | 1.13       |
| -75                           | -3.61      | -2.54      | -0.55      | 0.74       | 0.88       | 1.11       |
| -60                           | -3.62      | -2.56      | -0.55      | 0.74       | 0.87       | 1.09       |
| -45                           | -3.62      | -2.58      | -0.54      | 0.76       | 0.86       | 1.07       |
| -30                           | -3.61      | -2.58      | -0.53      | 0.78       | 0.86       | 1.07       |
| -15                           | -3.60      | -2.58      | -0.51      | 0.79       | 0.87       | 1.09       |
| 0                             | -3.59      | -2.55      | -0.49      | 0.80       | 0.91       | 1.14       |
| 15                            | -3.58      | -2.52      | -0.47      | 0.81       | 0.95       | 1.20       |
| 30                            | -3.58      | -2.49      | -0.45      | 0.82       | 0.98       | 1.25       |
| 45                            | -3.58      | -2.47      | -0.44      | 0.83       | 1.01       | 1.28       |
| 60                            | -3.58      | -2.47      | -0.44      | 0.83       | 1.01       | 1.29       |
| 75                            | -3.57      | -2.48      | -0.45      | 0.83       | 1.00       | 1.27       |
| 90                            | -3.57      | -2.51      | -0.47      | 0.83       | 0.97       | 1.23       |
| 105                           | -3.58      | -2.53      | -0.48      | 0.82       | 0.94       | 1.18       |
| 120                           | -3.59      | -2.56      | -0.50      | 0.81       | 0.90       | 1.13       |
| 135                           | -3.60      | -2.57      | -0.52      | 0.80       | 0.88       | 1.09       |
| 150                           | -3.61      | -2.57      | -0.54      | 0.77       | 0.87       | 1.08       |
| 165                           | -3.62      | -2.56      | -0.54      | 0.75       | 0.88       | 1.09       |
| 180                           | -3.62      | -2.54      | -0.55      | 0.74       | 0.88       | 1.11       |

**Table S7:** Relative electronic energies, of the first 6 electronic states, for NO+H<sub>2</sub>O as a function of torsion angles  $-165^\circ \leq \phi_{\text{ONOH}} \leq 180^\circ$  at a fixed intermolecular distance of  $R_{\text{ON}} = 1.91 \text{ \AA}$ . All energies are reported relative to D<sub>2</sub> (A<sup>2</sup>Σ<sup>+</sup>) at  $R_{\text{ON}} = 10 \text{ \AA}$ . The calculations were performed at the EOM-EA-CCSD/d-aug-cc-pVTZ//EOM-EA-CCSD/aug-cc-pVTZ level of theory.

| $\phi_{\text{ONOH}} (^\circ)$ | D <sub>0</sub> (eV) | D <sub>1</sub> (eV) | D <sub>2</sub> (eV) | D <sub>3</sub> (eV) | D <sub>4</sub> (eV) | D <sub>5</sub> (eV) |
|-------------------------------|---------------------|---------------------|---------------------|---------------------|---------------------|---------------------|
| -165                          | -3.96               | -3.15               | -0.56               | 0.58                | 0.65                | 0.92                |
| -150                          | -3.97               | -3.14               | -0.56               | 0.59                | 0.64                | 0.93                |
| -135                          | -3.97               | -3.14               | -0.55               | 0.59                | 0.63                | 0.93                |
| -120                          | -3.97               | -3.14               | -0.55               | 0.59                | 0.63                | 0.93                |
| -105                          | -3.97               | -3.14               | -0.55               | 0.59                | 0.64                | 0.93                |
| -90                           | -3.96               | -3.15               | -0.56               | 0.59                | 0.65                | 0.93                |
| -75                           | -3.96               | -3.16               | -0.57               | 0.59                | 0.66                | 0.92                |
| -60                           | -3.95               | -3.17               | -0.57               | 0.60                | 0.67                | 0.91                |
| -45                           | -3.95               | -3.18               | -0.56               | 0.61                | 0.67                | 0.89                |
| -30                           | -3.94               | -3.18               | -0.55               | 0.62                | 0.68                | 0.90                |
| -15                           | -3.94               | -3.18               | -0.54               | 0.64                | 0.68                | 0.92                |
| 0                             | -3.93               | -3.16               | -0.52               | 0.67                | 0.69                | 0.96                |
| 15                            | -3.92               | -3.14               | -0.51               | 0.69                | 0.70                | 1.01                |
| 30                            | -3.92               | -3.11               | -0.50               | 0.69                | 0.73                | 1.05                |
| 45                            | -3.91               | -3.10               | -0.50               | 0.70                | 0.75                | 1.08                |
| 60                            | -3.91               | -3.10               | -0.49               | 0.70                | 0.75                | 1.08                |
| 75                            | -3.91               | -3.11               | -0.50               | 0.70                | 0.74                | 1.07                |
| 90                            | -3.91               | -3.12               | -0.51               | 0.70                | 0.72                | 1.03                |
| 105                           | -3.92               | -3.15               | -0.52               | 0.69                | 0.70                | 0.99                |
| 120                           | -3.93               | -3.16               | -0.53               | 0.66                | 0.70                | 0.94                |
| 135                           | -3.94               | -3.18               | -0.55               | 0.63                | 0.69                | 0.91                |
| 150                           | -3.95               | -3.18               | -0.56               | 0.62                | 0.68                | 0.90                |
| 165                           | -3.95               | -3.17               | -0.57               | 0.60                | 0.68                | 0.91                |
| 180                           | -3.96               | -3.16               | -0.57               | 0.59                | 0.67                | 0.92                |

**Table S8:** Relative electronic energies, of the first 6 electronic states, for NO+H<sub>2</sub>O as a function of torsion angles  $-165^\circ \leq \phi_{\text{ONOH}} \leq 180^\circ$  at a fixed intermolecular distance of  $R_{\text{ON}} = 2.01 \text{ \AA}$ . All energies are reported relative to  $D_2 (A^2\Sigma^+)$  at  $R_{\text{ON}} = 10 \text{ \AA}$ . The calculations were performed at the EOM-EA-CCSD/d-aug-cc-pVTZ//EOM-EA-CCSD/aug-cc-pVTZ level of theory.

| $\phi_{\text{ONOH}} (^\circ)$ | $D_0$ (eV) | $D_1$ (eV) | $D_2$ (eV) | $D_3$ (eV) | $D_4$ (eV) | $D_5$ (eV) |
|-------------------------------|------------|------------|------------|------------|------------|------------|
| -165                          | -4.22      | -3.61      | -0.56      | 0.44       | 0.55       | 0.79       |
| -150                          | -4.23      | -3.61      | -0.56      | 0.43       | 0.54       | 0.79       |
| -135                          | -4.23      | -3.61      | -0.55      | 0.42       | 0.53       | 0.79       |
| -120                          | -4.23      | -3.61      | -0.55      | 0.42       | 0.53       | 0.79       |
| -105                          | -4.23      | -3.61      | -0.56      | 0.43       | 0.54       | 0.79       |
| -90                           | -4.22      | -3.61      | -0.56      | 0.44       | 0.55       | 0.79       |
| -75                           | -4.22      | -3.62      | -0.57      | 0.44       | 0.56       | 0.79       |
| -60                           | -4.21      | -3.62      | -0.56      | 0.45       | 0.58       | 0.78       |
| -45                           | -4.20      | -3.63      | -0.56      | 0.46       | 0.59       | 0.77       |
| -30                           | -4.20      | -3.63      | -0.55      | 0.47       | 0.60       | 0.78       |
| -15                           | -4.19      | -3.62      | -0.54      | 0.49       | 0.60       | 0.80       |
| 0                             | -4.18      | -3.60      | -0.54      | 0.51       | 0.60       | 0.84       |
| 15                            | -4.18      | -3.59      | -0.53      | 0.54       | 0.60       | 0.88       |
| 30                            | -4.17      | -3.57      | -0.52      | 0.56       | 0.60       | 0.92       |
| 45                            | -4.17      | -3.56      | -0.52      | 0.57       | 0.60       | 0.94       |
| 60                            | -4.17      | -3.56      | -0.52      | 0.58       | 0.60       | 0.94       |
| 75                            | -4.17      | -3.57      | -0.52      | 0.57       | 0.61       | 0.93       |
| 90                            | -4.17      | -3.58      | -0.53      | 0.55       | 0.61       | 0.90       |
| 105                           | -4.18      | -3.60      | -0.53      | 0.52       | 0.61       | 0.86       |
| 120                           | -4.19      | -3.61      | -0.54      | 0.50       | 0.61       | 0.82       |
| 135                           | -4.19      | -3.62      | -0.55      | 0.48       | 0.61       | 0.79       |
| 150                           | -4.20      | -3.62      | -0.56      | 0.47       | 0.60       | 0.78       |
| 165                           | -4.21      | -3.62      | -0.56      | 0.46       | 0.59       | 0.78       |
| 180                           | -4.21      | -3.62      | -0.57      | 0.45       | 0.57       | 0.79       |

**Table S9:** Relative electronic energies of the first six electronic states for NO+H<sub>2</sub>O as a function of the N-O bond length for  $R_{\text{ON}}=1.61$  Å. All energies are reported relative to the D<sub>2</sub> state at  $R_{\text{ON}} = 10$  Å. The calculations were performed at the EOM-EA-CCSD/d-aug-cc-pVTZ//EOM-EA-CCSD/aug-cc-pVTZ level of theory.

| $r_{\text{NO}}$ (Å) | D <sub>0</sub> (eV) | D <sub>1</sub> (eV) | D <sub>2</sub> (eV) | D <sub>3</sub> (eV) | D <sub>4</sub> (eV) | D <sub>5</sub> (eV) |
|---------------------|---------------------|---------------------|---------------------|---------------------|---------------------|---------------------|
| 1.06                | -2.08               | -0.19               | -0.07               | 1.31                | 1.71                | 1.74                |
| 1.07                | -2.23               | -0.32               | -0.15               | 1.23                | 1.66                | 1.68                |
| 1.08                | -2.36               | -0.44               | -0.22               | 1.17                | 1.62                | 1.65                |
| 1.09                | -2.47               | -0.53               | -0.26               | 1.14                | 1.60                | 1.62                |
| 1.1                 | -2.56               | -0.62               | -0.30               | 1.11                | 1.60                | 1.61                |
| 1.11                | -2.65               | -0.69               | -0.32               | 1.10                | 1.60                | 1.62                |
| 1.12                | -2.72               | -0.74               | -0.32               | 1.09                | 1.62                | 1.63                |
| 1.13                | -2.77               | -0.79               | -0.32               | 1.10                | 1.65                | 1.66                |
| 1.14                | -2.82               | -0.82               | -0.31               | 1.12                | 1.69                | 1.70                |
| 1.15                | -2.85               | -0.84               | -0.28               | 1.15                | 1.74                | 1.74                |
| 1.16                | -2.87               | -0.85               | -0.25               | 1.19                | 1.79                | 1.80                |
| 1.17                | -2.88               | -0.86               | -0.21               | 1.23                | 1.85                | 1.86                |
| 1.18                | -2.89               | -0.85               | -0.17               | 1.29                | 1.92                | 1.93                |

**Table S10:** Relative electronic energies of the first six electronic states for NO+H<sub>2</sub>O as a function of the N-O bond length for  $R_{\text{ON}}=1.71$  Å. All energies are reported relative to the D<sub>2</sub> state at  $R_{\text{ON}} = 10$  Å. The calculations were performed at the EOM-EA-CCSD/d-aug-cc-pVTZ//EOM-EA-CCSD/aug-cc-pVTZ level of theory.

| $r_{\text{NO}}$ (Å) | D <sub>0</sub> (eV) | D <sub>1</sub> (eV) | D <sub>2</sub> (eV) | D <sub>3</sub> (eV) | D <sub>4</sub> (eV) | D <sub>5</sub> (eV) |
|---------------------|---------------------|---------------------|---------------------|---------------------|---------------------|---------------------|
| 1.06                | -2.71               | -1.29               | -0.35               | 0.99                | 1.23                | 1.38                |
| 1.07                | -2.85               | -1.42               | -0.40               | 0.95                | 1.20                | 1.35                |
| 1.08                | -2.96               | -1.53               | -0.44               | 0.91                | 1.18                | 1.33                |
| 1.09                | -3.06               | -1.62               | -0.47               | 0.90                | 1.18                | 1.33                |
| 1.1                 | -3.14               | -1.69               | -0.48               | 0.89                | 1.20                | 1.34                |
| 1.11                | -3.21               | -1.75               | -0.48               | 0.90                | 1.23                | 1.37                |
| 1.12                | -3.27               | -1.80               | -0.47               | 0.92                | 1.26                | 1.40                |
| 1.13                | -3.31               | -1.84               | -0.45               | 0.95                | 1.31                | 1.44                |
| 1.14                | -3.34               | -1.87               | -0.42               | 0.99                | 1.36                | 1.49                |
| 1.15                | -3.36               | -1.88               | -0.38               | 1.03                | 1.42                | 1.55                |
| 1.16                | -3.36               | -1.89               | -0.34               | 1.09                | 1.50                | 1.62                |
| 1.17                | -3.36               | -1.88               | -0.28               | 1.15                | 1.58                | 1.69                |
| 1.18                | -3.35               | -1.87               | -0.22               | 1.22                | 1.66                | 1.77                |

**Table S11:** Relative electronic energies of the first six electronic states for NO+H<sub>2</sub>O as a function of the N-O bond length for  $R_{\text{ON}}=1.81$  Å. All energies are reported relative to the D<sub>2</sub> state at  $R_{\text{ON}} = 10$  Å. The calculations were performed at the EOM-EA-CCSD/d-aug-cc-pVTZ//EOM-EA-CCSD/aug-cc-pVTZ level of theory.

| $r_{\text{NO}}$ (Å) | D <sub>0</sub> (eV) | D <sub>1</sub> (eV) | D <sub>2</sub> (eV) | D <sub>3</sub> (eV) | D <sub>4</sub> (eV) | D <sub>5</sub> (eV) |
|---------------------|---------------------|---------------------|---------------------|---------------------|---------------------|---------------------|
| 1.06                | -3.25               | -2.19               | -0.47               | 0.79                | 0.88                | 1.11                |
| 1.07                | -3.38               | -2.32               | -0.51               | 0.75                | 0.86                | 1.09                |
| 1.08                | -3.49               | -2.42               | -0.53               | 0.74                | 0.86                | 1.09                |
| 1.09                | -3.58               | -2.51               | -0.55               | 0.74                | 0.87                | 1.09                |
| 1.1                 | -3.65               | -2.58               | -0.54               | 0.75                | 0.89                | 1.12                |
| 1.11                | -3.71               | -2.64               | -0.53               | 0.77                | 0.93                | 1.15                |
| 1.12                | -3.75               | -2.68               | -0.51               | 0.80                | 0.98                | 1.19                |
| 1.13                | -3.79               | -2.72               | -0.48               | 0.85                | 1.03                | 1.24                |
| 1.14                | -3.81               | -2.74               | -0.43               | 0.90                | 1.10                | 1.31                |
| 1.15                | -3.82               | -2.75               | -0.38               | 0.96                | 1.17                | 1.38                |
| 1.16                | -3.81               | -2.75               | -0.32               | 1.02                | 1.25                | 1.45                |
| 1.17                | -3.80               | -2.74               | -0.26               | 1.10                | 1.34                | 1.54                |
| 1.18                | -3.78               | -2.72               | -0.18               | 1.18                | 1.44                | 1.63                |



**Table S12:** Relative electronic energies of the first six electronic states for NO+H<sub>2</sub>O as a function of the N-O bond length for  $R_{\text{ON}}=1.91$  Å. All energies are reported relative to the D<sub>2</sub> state at  $R_{\text{ON}} = 10$  Å. The calculations were performed at the EOM-EA-CCSD/d-aug-cc-pVTZ//EOM-EA-CCSD/aug-cc-pVTZ level of theory.

| $r_{\text{NO}}$ (Å) | D <sub>0</sub> (eV) | D <sub>1</sub> (eV) | D <sub>2</sub> (eV) | D <sub>3</sub> (eV) | D <sub>4</sub> (eV) | D <sub>5</sub> (eV) |
|---------------------|---------------------|---------------------|---------------------|---------------------|---------------------|---------------------|
| 1.06                | -3.68               | -2.88               | -0.52               | 0.60                | 0.68                | 0.92                |
| 1.07                | -3.80               | -3.00               | -0.55               | 0.58                | 0.66                | 0.90                |
| 1.08                | -3.90               | -3.11               | -0.57               | 0.58                | 0.66                | 0.91                |
| 1.09                | -3.99               | -3.19               | -0.57               | 0.60                | 0.67                | 0.92                |
| 1.1                 | -4.06               | -3.26               | -0.55               | 0.62                | 0.70                | 0.95                |
| 1.11                | -4.11               | -3.32               | -0.53               | 0.66                | 0.74                | 1.00                |
| 1.12                | -4.15               | -3.36               | -0.50               | 0.71                | 0.79                | 1.05                |
| 1.13                | -4.17               | -3.39               | -0.45               | 0.76                | 0.86                | 1.11                |
| 1.14                | -4.19               | -3.41               | -0.40               | 0.83                | 0.93                | 1.18                |
| 1.15                | -4.19               | -3.41               | -0.34               | 0.90                | 1.01                | 1.26                |
| 1.16                | -4.18               | -3.41               | -0.27               | 0.98                | 1.10                | 1.35                |
| 1.17                | -4.16               | -3.40               | -0.19               | 1.07                | 1.19                | 1.44                |
| 1.18                | -4.13               | -3.37               | -0.11               | 1.16                | 1.30                | 1.54                |

**Table S13:** Relative electronic energies of the first six electronic states for NO+H<sub>2</sub>O as a function of  $r_{\text{OH}_A}$  at a fixed  $R_{\text{ON}} = 1.76$  Å. All energies are reported relative to D<sub>2</sub> at  $R_{\text{ON}} = 10$  Å and the calculations were performed at the EOM-EA-CCSD/d-aug-cc-pVTZ//EOM-EA-CCSD/aug-cc-pVTZ level of theory.

| $r_{\text{OH}_A}$ (Å) | D <sub>0</sub> (eV) | D <sub>1</sub> (eV) | D <sub>2</sub> (eV) | D <sub>3</sub> (eV) | D <sub>4</sub> (eV) | D <sub>5</sub> (eV) |
|-----------------------|---------------------|---------------------|---------------------|---------------------|---------------------|---------------------|
| 1.00                  | -3.45               | -2.22               | -0.52               | 0.79                | 0.99                | 1.18                |
| 1.05                  | -3.34               | -2.08               | -0.51               | 0.87                | 1.11                | 1.30                |
| 1.10                  | -3.15               | -1.87               | -0.48               | 1.03                | 1.29                | 1.50                |
| 1.125                 | -3.03               | -1.75               | -0.46               | 1.13                | 1.41                | 1.61                |
| 1.15                  | -2.91               | -1.62               | -0.45               | 1.23                | 1.53                | 1.74                |
| 1.175                 | -2.77               | -1.48               | -0.43               | 1.35                | 1.67                | 1.88                |
| 1.20                  | -2.63               | -1.33               | -0.43               | 1.47                | 1.81                | 2.02                |
| 1.225                 | -2.48               | -1.18               | -0.42               | 1.60                | 1.96                | 2.17                |
| 1.25                  | -2.33               | -1.03               | -0.42               | 1.73                | 2.11                | 2.32                |
| 1.275                 | -2.18               | -0.87               | -0.43               | 1.87                | 2.27                | 2.48                |
| 1.30                  | -2.02               | -0.71               | -0.44               | 2.02                | 2.43                | 2.64                |
| 1.325                 | -1.86               | -0.54               | -0.45               | 2.18                | 2.61                | 2.82                |

**Table S14:** Relative electronic energies of the first six electronic states for NO+H<sub>2</sub>O as a function of  $r_{\text{OH}_A}$  at a fixed  $R_{\text{ON}} = 1.787$  Å. All energies are reported relative to D<sub>2</sub> at  $R_{\text{ON}} = 10$  Å and the calculations were performed at the EOM-EA-CCSD/d-aug-cc-pVTZ//EOM-EA-CCSD/aug-cc-pVTZ level of theory.

| $r_{\text{OH}_A}$ (Å) | D <sub>0</sub> (eV) | D <sub>1</sub> (eV) | D <sub>2</sub> (eV) | D <sub>3</sub> (eV) | D <sub>4</sub> (eV) | D <sub>5</sub> (eV) |
|-----------------------|---------------------|---------------------|---------------------|---------------------|---------------------|---------------------|
| 1.00                  | -3.56               | -2.42               | -0.53               | 0.75                | 0.91                | 1.12                |
| 1.05                  | -3.44               | -2.28               | -0.53               | 0.84                | 1.03                | 1.24                |
| 1.10                  | -3.25               | -2.08               | -0.49               | 1.00                | 1.21                | 1.44                |
| 1.125                 | -3.14               | -1.96               | -0.47               | 1.10                | 1.33                | 1.56                |
| 1.15                  | -3.01               | -1.83               | -0.45               | 1.21                | 1.45                | 1.68                |
| 1.175                 | -2.88               | -1.69               | -0.43               | 1.32                | 1.59                | 1.82                |
| 1.20                  | -2.74               | -1.54               | -0.42               | 1.45                | 1.73                | 1.96                |
| 1.225                 | -2.59               | -1.39               | -0.41               | 1.57                | 1.87                | 2.11                |
| 1.25                  | -2.44               | -1.24               | -0.41               | 1.71                | 2.02                | 2.26                |
| 1.275                 | -2.29               | -1.08               | -0.41               | 1.84                | 2.18                | 2.42                |
| 1.30                  | -2.13               | -0.92               | -0.41               | 1.98                | 2.33                | 2.57                |
| 1.325                 | -1.98               | -0.76               | -0.42               | 2.12                | 2.49                | 2.73                |
| 1.35                  | -1.82               | -0.60               | -0.43               | 2.27                | 2.66                | 2.90                |
| 1.36                  | -1.75               | -0.53               | -0.44               | 2.34                | 2.73                | 2.97                |
| 1.365                 | -1.72               | -0.50               | -0.44               | 2.37                | 2.77                | 3.01                |

**Table S15:** Relative electronic energies of the first six electronic states for NO+H<sub>2</sub>O as a function of  $r_{\text{OH}_A}$  at a fixed  $R_{\text{ON}} = 1.81$  Å. All energies are reported relative to D<sub>2</sub> at  $R_{\text{ON}} = 10$  Å and the calculations were performed at the EOM-EA-CCSD/d-aug-cc-pVTZ//EOM-EA-CCSD/aug-cc-pVTZ level of theory.

| $r_{\text{OH}_A}$ (Å) | D <sub>0</sub> (eV) | D <sub>1</sub> (eV) | D <sub>2</sub> (eV) | D <sub>3</sub> (eV) | D <sub>4</sub> (eV) | D <sub>5</sub> (eV) |
|-----------------------|---------------------|---------------------|---------------------|---------------------|---------------------|---------------------|
| 1.00                  | -3.64               | -2.58               | -0.54               | 0.72                | 0.85                | 1.07                |
| 1.05                  | -3.53               | -2.45               | -0.53               | 0.82                | 0.96                | 1.19                |
| 1.10                  | -3.33               | -2.24               | -0.49               | 0.98                | 1.15                | 1.39                |
| 1.125                 | -3.22               | -2.12               | -0.46               | 1.08                | 1.26                | 1.51                |
| 1.15                  | -3.09               | -1.99               | -0.44               | 1.19                | 1.39                | 1.64                |
| 1.175                 | -2.96               | -1.85               | -0.42               | 1.31                | 1.52                | 1.77                |
| 1.20                  | -2.82               | -1.71               | -0.40               | 1.43                | 1.66                | 1.92                |
| 1.225                 | -2.67               | -1.56               | -0.39               | 1.56                | 1.81                | 2.06                |
| 1.25                  | -2.53               | -1.41               | -0.39               | 1.69                | 1.96                | 2.21                |
| 1.275                 | -2.37               | -1.25               | -0.39               | 1.82                | 2.11                | 2.37                |
| 1.30                  | -2.22               | -1.09               | -0.39               | 1.96                | 2.26                | 2.52                |
| 1.325                 | -2.06               | -0.93               | -0.40               | 2.10                | 2.42                | 2.68                |
| 1.35                  | -1.91               | -0.78               | -0.41               | 2.24                | 2.58                | 2.84                |
| 1.36                  | -1.85               | -0.71               | -0.41               | 2.30                | 2.64                | 2.90                |
| 1.365                 | -1.81               | -0.68               | -0.41               | 2.33                | 2.67                | 2.93                |
| 1.37                  | -1.78               | -0.65               | -0.41               | 2.36                | 2.70                | 2.96                |

**Table S16:** Relative electronic energies of the first six electronic states for NO+H<sub>2</sub>O as a function of  $r_{\text{OH}_A}$  at a fixed  $R_{\text{ON}} = 1.91$  Å. All energies are reported relative to D<sub>2</sub> at  $R_{\text{ON}} = 10$  Å and the calculations were performed at the EOM-EA-CCSD/d-aug-cc-pVTZ//EOM-EA-CCSD/aug-cc-pVTZ level of theory.

| $r_{\text{OH}_A}$ (Å) | D <sub>0</sub> (eV) | D <sub>1</sub> (eV) | D <sub>2</sub> (eV) | D <sub>3</sub> (eV) | D <sub>4</sub> (eV) | D <sub>5</sub> (eV) |
|-----------------------|---------------------|---------------------|---------------------|---------------------|---------------------|---------------------|
| 1.00                  | -3.97               | -3.17               | -0.57               | 0.58                | 0.66                | 0.90                |
| 1.05                  | -3.84               | -3.04               | -0.54               | 0.71                | 0.76                | 1.03                |
| 1.10                  | -3.65               | -2.84               | -0.48               | 0.90                | 0.93                | 1.23                |
| 1.125                 | -3.53               | -2.72               | -0.44               | 1.02                | 1.04                | 1.35                |
| 1.15                  | -3.40               | -2.59               | -0.40               | 1.13                | 1.16                | 1.48                |
| 1.175                 | -3.27               | -2.45               | -0.36               | 1.25                | 1.30                | 1.62                |
| 1.20                  | -3.13               | -2.31               | -0.33               | 1.38                | 1.44                | 1.76                |
| 1.225                 | -2.99               | -2.16               | -0.31               | 1.50                | 1.59                | 1.91                |
| 1.25                  | -2.79               | -2.01               | -0.29               | 1.76                | 2.15                | 2.65                |
| 1.275                 | -2.69               | -1.86               | -0.27               | 1.77                | 1.90                | 2.21                |
| 1.30                  | -2.54               | -1.71               | -0.26               | 1.90                | 2.05                | 2.37                |
| 1.325                 | -2.38               | -1.55               | -0.25               | 2.04                | 2.20                | 2.52                |
| 1.35                  | -2.23               | -1.40               | -0.25               | 2.17                | 2.36                | 2.67                |
| 1.36                  | -2.17               | -1.33               | -0.25               | 2.23                | 2.42                | 2.74                |
| 1.365                 | -2.14               | -1.30               | -0.25               | 2.26                | 2.45                | 2.77                |
| 1.37                  | -2.11               | -1.27               | -0.25               | 2.28                | 2.48                | 2.80                |

**Table S17:** Relative electronic energies of the first six electronic states for NO+H<sub>2</sub>O as a function of  $r_{\text{OH}_B}$  at a fixed  $R_{\text{ON}} = 1.76$  Å. All energies are reported relative to D<sub>2</sub> at  $R_{\text{ON}} = 10$  Å and the calculations were performed at the EOM-EA-CCSD/d-aug-cc-pVTZ//EOM-EA-CCSD/aug-cc-pVTZ level of theory.

| $r_{\text{OH}_B}$ (Å) | D <sub>0</sub> (eV) | D <sub>1</sub> (eV) | D <sub>2</sub> (eV) | D <sub>3</sub> (eV) | D <sub>4</sub> (eV) | D <sub>5</sub> (eV) |
|-----------------------|---------------------|---------------------|---------------------|---------------------|---------------------|---------------------|
| 1.00                  | -3.41               | -2.16               | -0.52               | 0.81                | 1.03                | 1.23                |
| 1.05                  | -3.31               | -2.05               | -0.49               | 0.85                | 1.13                | 1.32                |
| 1.10                  | -3.14               | -1.87               | -0.42               | 0.95                | 1.30                | 1.49                |
| 1.125                 | -3.03               | -1.76               | -0.39               | 1.02                | 1.41                | 1.60                |
| 1.15                  | -2.91               | -1.64               | -0.35               | 1.10                | 1.53                | 1.71                |
| 1.175                 | -2.79               | -1.51               | -0.32               | 1.20                | 1.66                | 1.84                |
| 1.20                  | -2.65               | -1.37               | -0.30               | 1.30                | 1.80                | 1.98                |
| 1.225                 | -2.51               | -1.23               | -0.28               | 1.41                | 1.94                | 2.12                |
| 1.25                  | -2.37               | -1.08               | -0.27               | 1.52                | 2.09                | 2.27                |
| 1.275                 | -2.22               | -0.93               | -0.27               | 1.65                | 2.24                | 2.42                |
| 1.30                  | -2.06               | -0.77               | -0.27               | 1.77                | 2.39                | 2.57                |
| 1.325                 | -1.91               | -0.61               | -0.28               | 1.90                | 2.55                | 2.72                |

**Table S18:** Relative electronic energies of the first six electronic states for NO+H<sub>2</sub>O as a function of  $r_{\text{OH}_B}$  at a fixed  $R_{\text{ON}} = 1.787$  Å. All energies are reported relative to D<sub>2</sub> at  $R_{\text{ON}} = 10$  Å and the calculations were performed at the EOM-EA-CCSD/d-aug-cc-pVTZ//EOM-EA-CCSD/aug-cc-pVTZ level of theory.

| $r_{\text{OH}_B}$ (Å) | D <sub>0</sub> (eV) | D <sub>1</sub> (eV) | D <sub>2</sub> (eV) | D <sub>3</sub> (eV) | D <sub>4</sub> (eV) | D <sub>5</sub> (eV) |
|-----------------------|---------------------|---------------------|---------------------|---------------------|---------------------|---------------------|
| 1.00                  | -3.52               | -2.37               | -0.54               | 0.77                | 0.95                | 1.16                |
| 1.05                  | -3.42               | -2.26               | -0.50               | 0.81                | 1.05                | 1.26                |
| 1.10                  | -3.24               | -2.08               | -0.43               | 0.92                | 1.23                | 1.43                |
| 1.125                 | -3.13               | -1.97               | -0.39               | 0.99                | 1.34                | 1.54                |
| 1.15                  | -3.02               | -1.85               | -0.35               | 1.08                | 1.46                | 1.66                |
| 1.175                 | -2.89               | -1.72               | -0.32               | 1.17                | 1.59                | 1.79                |
| 1.20                  | -2.75               | -1.58               | -0.29               | 1.27                | 1.73                | 1.92                |
| 1.225                 | -2.61               | -1.43               | -0.27               | 1.38                | 1.87                | 2.06                |
| 1.25                  | -2.47               | -1.29               | -0.25               | 1.50                | 2.02                | 2.21                |
| 1.275                 | -2.32               | -1.13               | -0.25               | 1.62                | 2.17                | 2.36                |
| 1.30                  | -2.17               | -0.98               | -0.25               | 1.74                | 2.32                | 2.51                |
| 1.325                 | -2.02               | -0.82               | -0.25               | 1.87                | 2.47                | 2.66                |
| 1.35                  | -1.86               | -0.66               | -0.25               | 2.01                | 2.63                | 2.81                |
| 1.36                  | -1.80               | -0.60               | -0.26               | 2.06                | 2.69                | 2.87                |
| 1.365                 | -1.77               | -0.57               | -0.26               | 2.09                | 2.72                | 2.91                |

**Table S19:** Relative electronic energies of the first six electronic states for NO+H<sub>2</sub>O as a function of  $r_{\text{OH}_B}$  at a fixed  $R_{\text{ON}} = 1.81$  Å. All energies are reported relative to D<sub>2</sub> at  $R_{\text{ON}} = 10$  Å and the calculations were performed at the EOM-EA-CCSD/d-aug-cc-pVTZ//EOM-EA-CCSD/aug-cc-pVTZ level of theory.

| $r_{\text{OH}_B}$ (Å) | D <sub>0</sub> (eV) | D <sub>1</sub> (eV) | D <sub>2</sub> (eV) | D <sub>3</sub> (eV) | D <sub>4</sub> (eV) | D <sub>5</sub> (eV) |
|-----------------------|---------------------|---------------------|---------------------|---------------------|---------------------|---------------------|
| 1.00                  | -3.61               | -2.54               | -0.55               | 0.74                | 0.88                | 1.11                |
| 1.05                  | -3.50               | -2.42               | -0.51               | 0.79                | 0.99                | 1.21                |
| 1.10                  | -3.33               | -2.24               | -0.43               | 0.90                | 1.17                | 1.39                |
| 1.125                 | -3.22               | -2.13               | -0.39               | 0.97                | 1.28                | 1.49                |
| 1.15                  | -3.10               | -2.01               | -0.35               | 1.06                | 1.40                | 1.61                |
| 1.175                 | -2.97               | -1.88               | -0.31               | 1.15                | 1.53                | 1.74                |
| 1.20                  | -2.84               | -1.74               | -0.28               | 1.25                | 1.67                | 1.88                |
| 1.225                 | -2.70               | -1.60               | -0.25               | 1.36                | 1.81                | 2.02                |
| 1.25                  | -2.55               | -1.45               | -0.24               | 1.48                | 1.96                | 2.17                |
| 1.275                 | -2.40               | -1.30               | -0.22               | 1.60                | 2.11                | 2.32                |
| 1.30                  | -2.25               | -1.14               | -0.22               | 1.72                | 2.27                | 2.47                |
| 1.325                 | -2.10               | -0.99               | -0.22               | 1.85                | 2.42                | 2.62                |
| 1.35                  | -1.95               | -0.83               | -0.22               | 1.98                | 2.57                | 2.77                |
| 1.36                  | -1.88               | -0.77               | -0.22               | 2.04                | 2.64                | 2.83                |
| 1.365                 | -1.85               | -0.74               | -0.23               | 2.06                | 2.67                | 2.86                |
| 1.37                  | -1.82               | -0.71               | -0.23               | 2.09                | 2.70                | 2.89                |



**Table S20:** Relative electronic energies of the first six electronic states for NO+H<sub>2</sub>O as a function of  $r_{\text{OH}_B}$  at a fixed  $R_{\text{ON}} = 1.91$  Å. All energies are reported relative to D<sub>2</sub> at  $R_{\text{ON}} = 10$  Å and the calculations were performed at the EOM-EA-CCSD/d-aug-cc-pVTZ//EOM-EA-CCSD/aug-cc-pVTZ level of theory.

| $r_{\text{OH}_B}$ (Å) | D <sub>0</sub> (eV) | D <sub>1</sub> (eV) | D <sub>2</sub> (eV) | D <sub>3</sub> (eV) | D <sub>4</sub> (eV) | D <sub>5</sub> (eV) |
|-----------------------|---------------------|---------------------|---------------------|---------------------|---------------------|---------------------|
| 1.00                  | -3.95               | -3.15               | -0.57               | 0.59                | 0.68                | 0.93                |
| 1.05                  | -3.83               | -3.03               | -0.51               | 0.67                | 0.79                | 1.04                |
| 1.10                  | -3.64               | -2.83               | -0.42               | 0.80                | 0.97                | 1.22                |
| 1.125                 | -3.53               | -2.72               | -0.36               | 0.88                | 1.09                | 1.34                |
| 1.15                  | -3.41               | -2.60               | -0.31               | 0.97                | 1.21                | 1.46                |
| 1.175                 | -3.28               | -2.47               | -0.26               | 1.07                | 1.35                | 1.59                |
| 1.20                  | -3.15               | -2.33               | -0.21               | 1.17                | 1.49                | 1.73                |
| 1.225                 | -3.01               | -2.19               | -0.17               | 1.29                | 1.63                | 1.87                |
| 1.25                  | -2.86               | -2.04               | -0.14               | 1.40                | 1.78                | 2.02                |
| 1.275                 | -2.71               | -1.89               | -0.11               | 1.53                | 1.93                | 2.17                |
| 1.30                  | -2.57               | -1.74               | -0.09               | 1.65                | 2.09                | 2.32                |
| 1.325                 | -2.41               | -1.59               | -0.07               | 1.78                | 2.24                | 2.47                |
| 1.35                  | -2.26               | -1.44               | -0.06               | 1.91                | 2.39                | 2.63                |
| 1.36                  | -2.20               | -1.38               | -0.06               | 1.96                | 2.46                | 2.69                |
| 1.365                 | -2.17               | -1.35               | -0.06               | 1.99                | 2.49                | 2.72                |
| 1.37                  | -2.14               | -1.32               | -0.06               | 2.02                | 2.52                | 2.75                |

**Table S21:** Relative electronic energies of the D<sub>1</sub> and D<sub>2</sub> electronic states for NO+H<sub>2</sub>O as a function of  $r_{\text{OHA}}$  at a fixed  $R_{\text{ON}} = 1.787 \text{ \AA}$ . All energies are reported relative to D<sub>1</sub> at  $r_{\text{OHA}} = 1.0 \text{ \AA}$ . The calculations were performed at either the (9,9) NEVPT2/aug-cc-pVTZ//EOM-EA-CCSD/aug-cc-pVTZ level of theory or the EOM-EA-CCSD/aug-cc-pVTZ//EOM-EA-CCSD/aug-cc-pVTZ level of theory.

| $r_{\text{OHB}}$ (Å) | D <sub>1</sub> (eV)<br>NEVPT2 | D <sub>2</sub> (eV)<br>NEVPT2 | D <sub>1</sub> (eV)<br>EOM-EA-<br>CCSD | D <sub>2</sub> (eV)<br>EOM-EA-<br>CCSD |
|----------------------|-------------------------------|-------------------------------|----------------------------------------|----------------------------------------|
| 1.00                 | 0.00                          | 1.81                          | 0.00                                   | 1.90                                   |
| 1.05                 | 0.18                          | 1.84                          | 0.14                                   | 1.91                                   |
| 1.10                 | 0.36                          | 1.83                          | 0.34                                   | 1.95                                   |
| 1.125                | 0.46                          | 1.82                          | 0.46                                   | 1.97                                   |
| 1.15                 | 0.58                          | 1.81                          | 0.59                                   | 1.99                                   |
| 1.175                | 0.70                          | 1.80                          | 0.73                                   | 2.00                                   |
| 1.20                 | 0.84                          | 1.78                          | 0.88                                   | 2.01                                   |
| 1.225                | 0.98                          | 1.76                          | 1.03                                   | 2.02                                   |
| 1.25                 | 1.12                          | 1.73                          | 1.18                                   | 2.02                                   |
| 1.275                | 1.26                          | 1.71                          | 1.34                                   | 2.02                                   |
| 1.30                 | 1.40                          | 1.69                          | 1.50                                   | 2.01                                   |
| 1.325                | 1.54                          | 1.68                          | 1.66                                   | 2.00                                   |
| 1.35                 | 1.60                          | 1.76                          | 1.82                                   | 1.99                                   |
| 1.36                 | 1.61                          | 1.80                          | 1.89                                   | 1.99                                   |
| 1.365                | 1.61                          | 1.83                          | 1.93                                   | 1.99                                   |

## References

- (1) Schapiro, I.; Sivalingam, K.; Neese, F. Assessment of N-Electron Valence State Perturbation Theory for Vertical Excitation Energies. *J. Chem. Theory Comput.* **2013**, *9* (8), 3567–3580. <https://doi.org/10.1021/ct400136y>.
- (2) Neese, F. Software Update: The <scp>ORCA</Scp> Program System—Version 5.0. *WIREs Comput. Mol. Sci.* **2022**, *12* (5). <https://doi.org/10.1002/wcms.1606>.
- (3) Bode, B. M.; Gordon, M. S. MacMolPlt: A Graphical User Interface for GAMESS. *J. Mol. Graph. Model.* **1998**, *16* (3), 133–138. [https://doi.org/10.1016/S1093-3263\(99\)00002-9](https://doi.org/10.1016/S1093-3263(99)00002-9).
- (4) Plasser, F.; Wormit, M.; Dreuw, A. New Tools for the Systematic Analysis and Visualization of Electronic Excitations. I. Formalism. *J. Chem. Phys.* **2014**, *141* 024106. <https://doi.org/10.1063/1.4885819>.
- (5) Hanwell, M. D.; Curtis, D. E.; Lonie, D. C.; Vandermeersch, T.; Zurek, E.; Hutchison, G. R. Avogadro: An Advanced Semantic Chemical Editor, Visualization, and Analysis Platform. *J. Cheminform.* **2012**, *4* (1), 17. <https://doi.org/10.1186/1758-2946-4-17>.
